# Supplementary material for: Phase reconfiguration of multivalent nickel sulfides in hydrogen evolution
Source: Royal Society of Chemistry journal article supplement (doi:10.1039/d1ee02985a), 2021-12-22
Supplement: d1ee02985a1.pdf [file d1ee02985a1.pdf]

**Electronic Supplementary Material (ESI) for Energy & Environmental Science**

**Supporting Information**

**Phase reconfiguration of multivalent nickel sulfides in hydrogen evolution**

Yu Sun,<sup>a,b,c</sup> Jing Wu,<sup>a,b,c</sup> Zheng Zhang,<sup>a,b,c</sup> Qingliang Liao,<sup>a,b</sup> Suicai Zhang,<sup>a,b</sup> Xin Wang,<sup>a,b</sup>  
Yong Xie,<sup>a,b</sup> Kaikai Ma,<sup>a,b</sup> Zhuo Kang<sup>\*a,b</sup> and Yue Zhang<sup>\*a,b</sup>

<sup>a</sup>Beijing Advanced Innovation Center for Materials Genome Engineering, Beijing Key Laboratory for Advanced Energy Materials and Technologies, University of Science and Technology Beijing, Beijing 100083, China

<sup>b</sup>State Key Laboratory for Advanced Metals and Materials, School of Materials Science and Engineering, University of Science and Technology Beijing, Beijing 100083, China

<sup>c</sup>These authors contributed equally: Yu Sun, Jing Wu, Zheng Zhang.

\*e-mail: zhuokang@ustb.edu.cn; yuezhang@ustb.edu.cn

## Supporting Figures

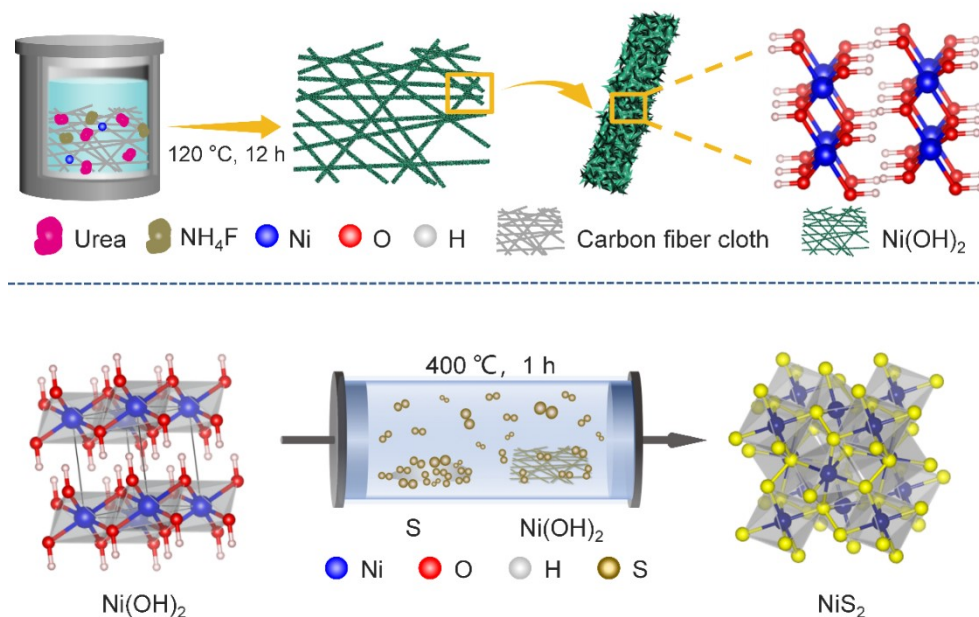

**Figure S1.** Fabrication of  $\text{Ni}_{1-x}\text{Fe}_x\text{S}_2$  catalysts. Schematic illustration of the fabrication procedure by directly growing  $\text{Ni}_{1-x}\text{Fe}_x\text{S}_2$  NSs, and the sulfurization process at 400 °C under the Argon protection.

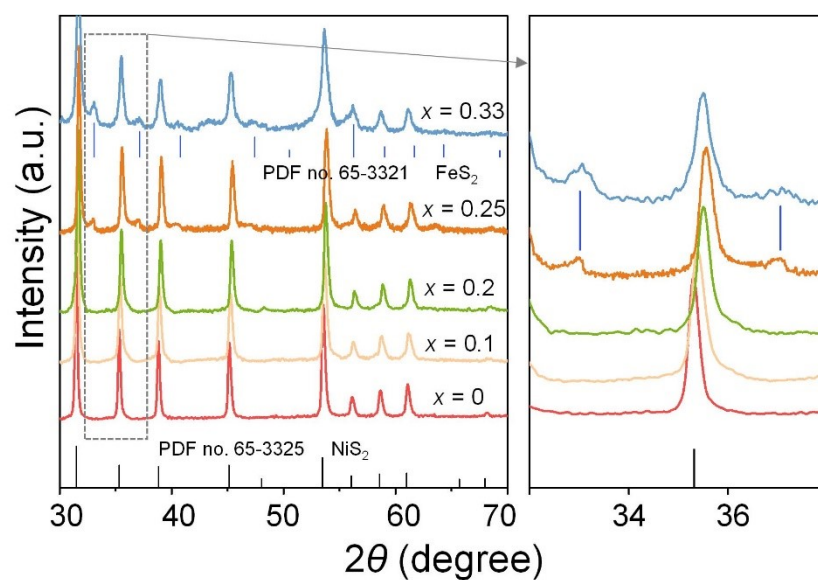

**Figure S2.** PXRD patterns of synthesized  $\text{Ni}_{1-x}\text{Fe}_x\text{S}_2$  ( $x \approx 0-0.33$ ). The right axis show the unit cell of cubic metal disulfides and the magnified PXRD patterns in the range between 32 and 38.

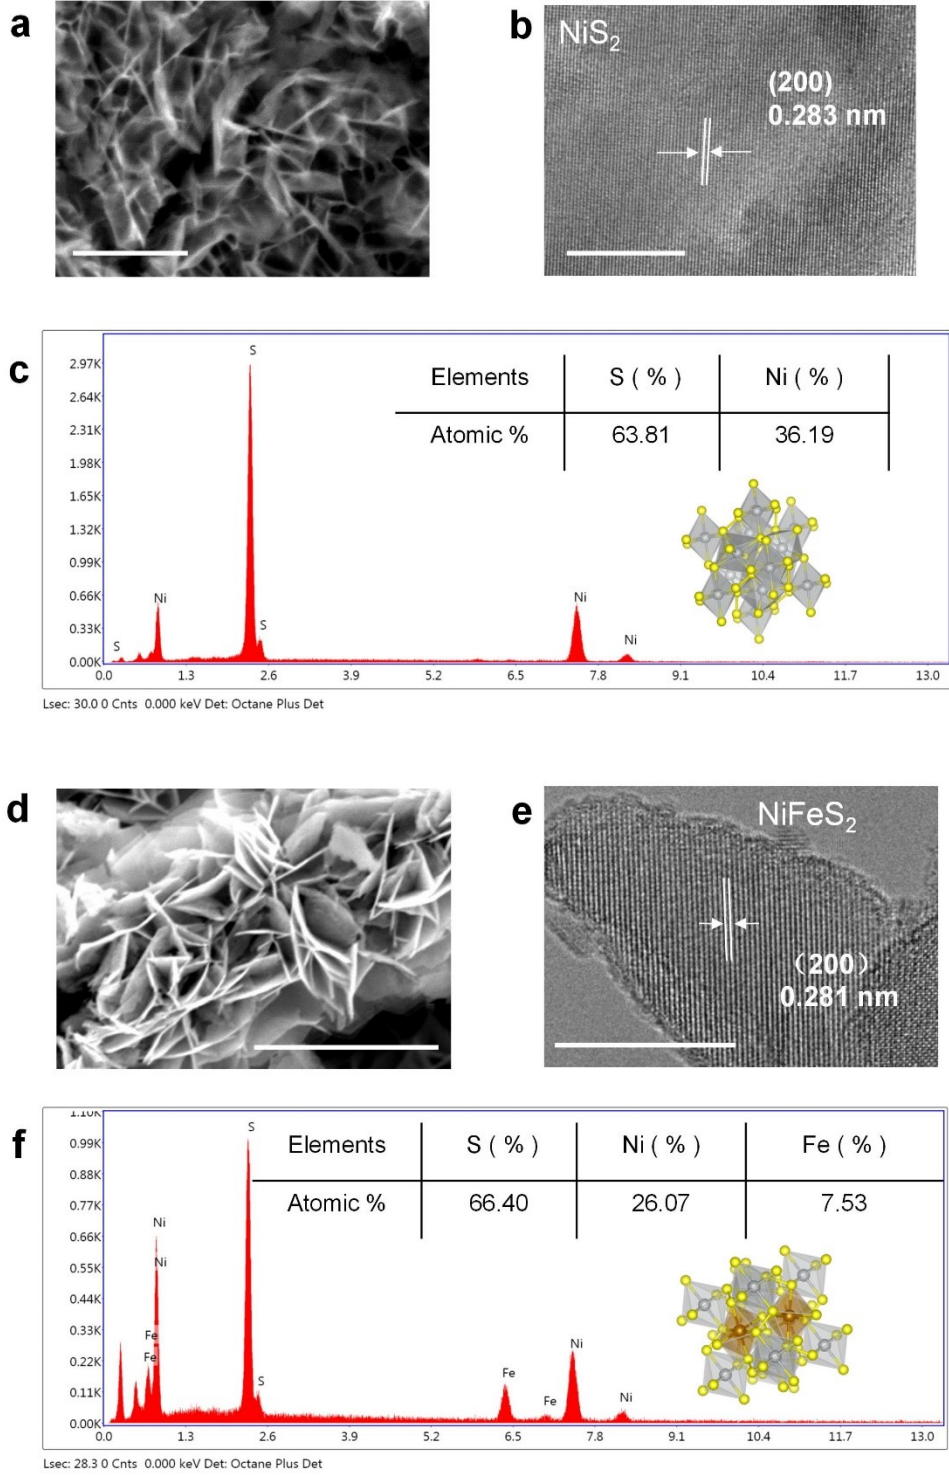

**Figure S3.** SEM-EDS elemental analysis and the TEM images of the as-prepared  $\text{Ni}_{1-x}\text{Fe}_x\text{S}_2$  electrode. **a**, SEM images of the carbon fiber coated with  $\text{NiS}_2$ . Scale bar, 1  $\mu\text{m}$ . **b**, TEM images of  $\text{NiS}_2$  NSs. Scale bar, 5 nm. **c**, The corresponding EDS elemental atomic ratio of Ni and S elements. **d**, Top-view SEM images of the carbon fiber coated with  $\text{Ni}_{0.8}\text{Fe}_{0.2}\text{S}_2$  NSs. Scale bar, 10  $\mu\text{m}$ . **e**, TEM images of  $\text{Ni}_{0.8}\text{Fe}_{0.2}\text{S}_2$  NSs. Scale bar, 10 nm. **f**, The corresponding EDS elemental atomic ratio of Ni, Fe and S elements. Insets of (**c**) and (**f**) is the corresponding atomic ratio of Ni, Fe and S elements and the lattice structure of  $\text{Ni}_{1-x}\text{Fe}_x\text{S}_2$ .

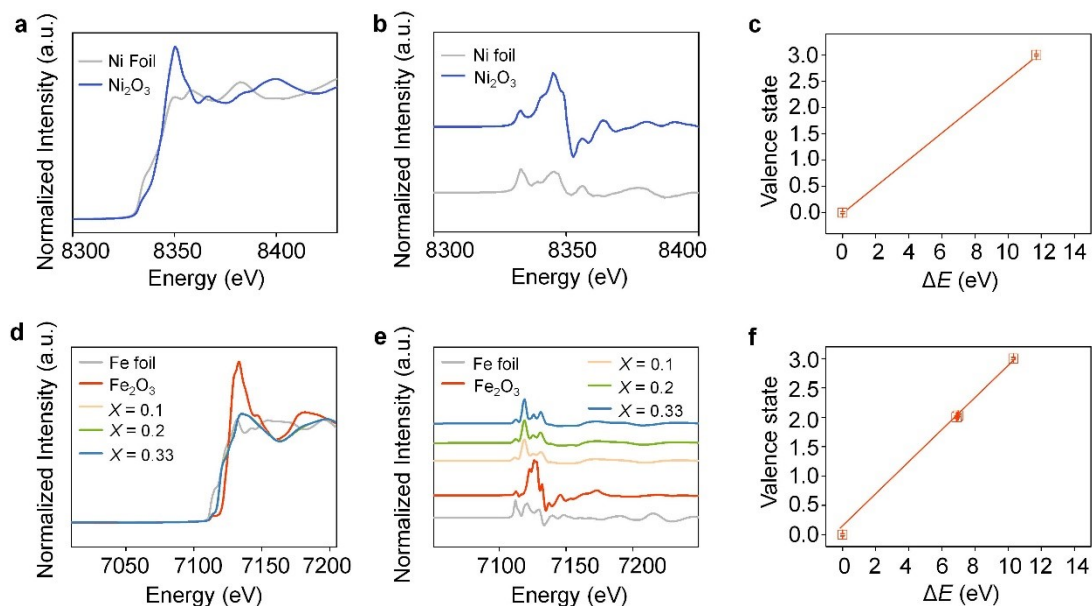

**Figure S4.** XAFS measurements. **a**, XANES spectra recorded at the Ni K-edge of nickel foil and  $\text{Ni}_2\text{O}_3$ . **b**, Normalized difference spectra for Ni K-edge XANES. **c**, The fitted average valence states of Ni from XANES spectra. Valence state of Ni Foil is approximately close to 0, valence state of  $\text{Ni}_2\text{O}_3$  is approximately close to 3+. **d**, XANES spectra recorded at the Fe K-edge of Iron foil and  $\text{Fe}_2\text{O}_3$ . **e**, Normalized difference spectra for Fe K-edge XANES. **f**, The fitted average valence states of Fe from XANES spectra. Valence state of Fe Foil is approximately close to 0, valence state of  $\text{Fe}_2\text{O}_3$  is approximately close to 3+. Error bars represent the standard deviation from at least three independent measurements.

Ni and Fe valence states of the samples were estimated by means of the absorption edge energy  $E_0$ , which was defined as the energy at the highest first derivative of the absorbance as shown in Figure S4b, e. Correspondingly, the absorption edge energy  $E_0$  of Ni foil with  $\text{Ni}^0$  valence state is determined as 8333.00 eV. Similarly, the Ni K-edge EXAFS spectra showed that the absorption edge energies  $E_0$  of the  $\text{NiS}_2$ ,  $\text{Ni}_{0.9}\text{Fe}_{0.1}\text{S}_2$ ,  $\text{Ni}_{0.8}\text{Fe}_{0.2}\text{S}_2$ , and  $\text{Ni}_{0.67}\text{Fe}_{0.33}\text{S}_2$  and  $\text{Ni}_2\text{O}_3$  were located at 8360.68, 8340.35, 8340.12, and 8340.27 and 8344.61 eV, respectively. The Fe K-edge EXAFS spectra presented that the absorption edge energies  $E_0$  of the Fe Foil,  $\text{Ni}_{0.9}\text{Fe}_{0.1}\text{S}_2$ ,  $\text{Ni}_{0.8}\text{Fe}_{0.2}\text{S}_2$ , and  $\text{Ni}_{0.67}\text{Fe}_{0.33}\text{S}_2$  and  $\text{Fe}_2\text{O}_3$  were located at 7112, 7118.92, 7118.98, 7118.89 and 7122.32 eV, respectively.

The obtained energy shifts ( $\Delta E$ ), as a function of the valence state, were shown in Figure S4c, f, together with a model linear function, which have been determined as a best fit to the data from the reference samples. Nickel and iron valence states in the synthesized Fe substituted nickel sulfides were calculated from the linear function, and these data were listed in Table S1.

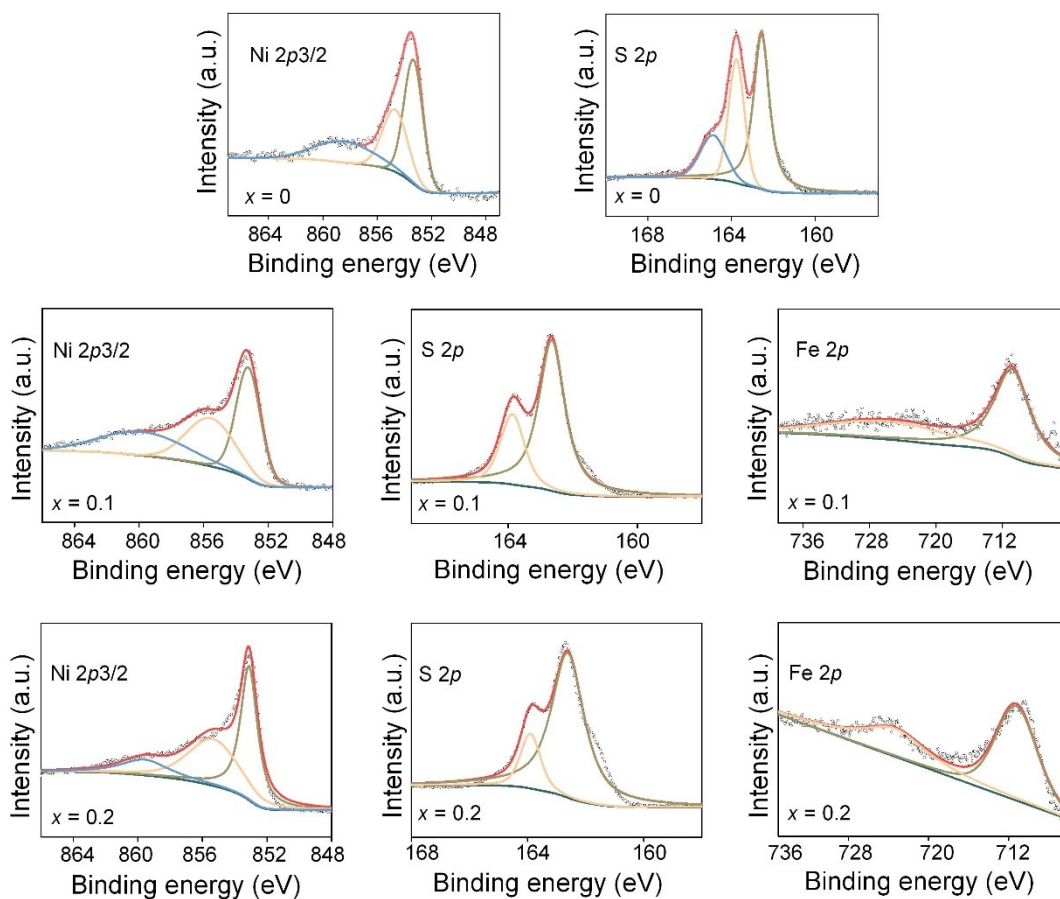

**Figure S5.** XPS Characterization of  $\text{Ni}_{1-x}\text{Fe}_x\text{S}_2$  ( $x = 0, 0.1, 0.2$ ) for the Ni  $2p_{3/2}$ , S  $2p$  and Fe  $2p$  regions. The broad S  $2p$  XPS peak was fitted into two main peaks. The peaks located at 162.6 and 163.8 eV were attributed to the S  $2p_{3/2}$  and S  $2p_{1/2}$  orbitals of bridging  $\text{S}_2^{2-}$ .

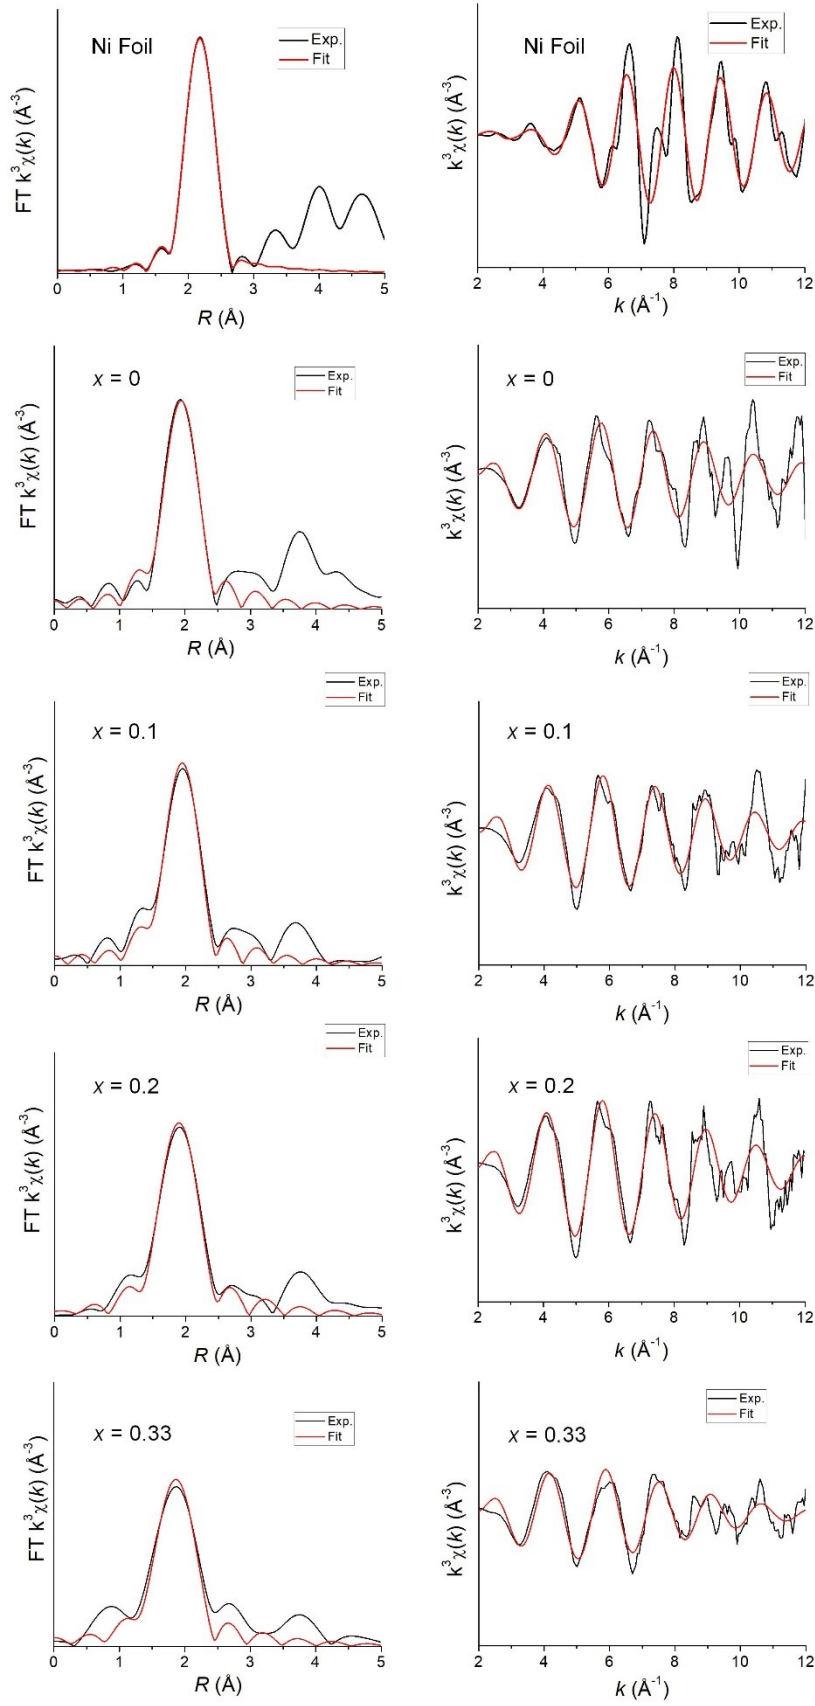

**Figure S6.** Ni K-edge EXAFS analysis of samples in  $R$  and  $k$  spaces. FT-EXAFS spectra and fits of Ni K-edges from Ni foil and  $\text{Ni}_{1-x}\text{Fe}_x\text{S}_2$  ( $x = 0, 0.1, 0.2, 0.33$ ) catalysts. The black lines represent the experiment data and the red lines represent the fitting values.



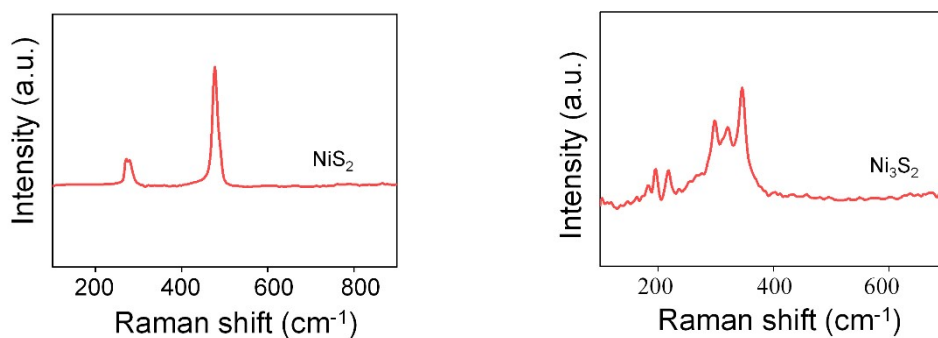

**Figure S7.** Raman spectrum of  $\text{NiS}_2$  and  $\text{Ni}_3\text{S}_2$ . The peaks at  $274.4(T_g)$ ,  $284.8(E_g)$ ,  $479.3(A_g)$   $\text{cm}^{-1}$  previously attributed to  $\text{NiS}_2$ , peaks at  $187.6 (A_1(2))$ ,  $202.1 (E(4))$ ,  $223.6 (E(3))$ ,  $303.6 (E(2))$ ,  $324.6 (A_1(1))$ ,  $350.3 (E(1))$   $\text{cm}^{-1}$  were correlated respectively with two  $A_1$  stretching and four  $E$  bending vibration of Ni-S in the heazlewoodite-phase  $\text{Ni}_3\text{S}_2$ , and the peaks were shown in Table S4.

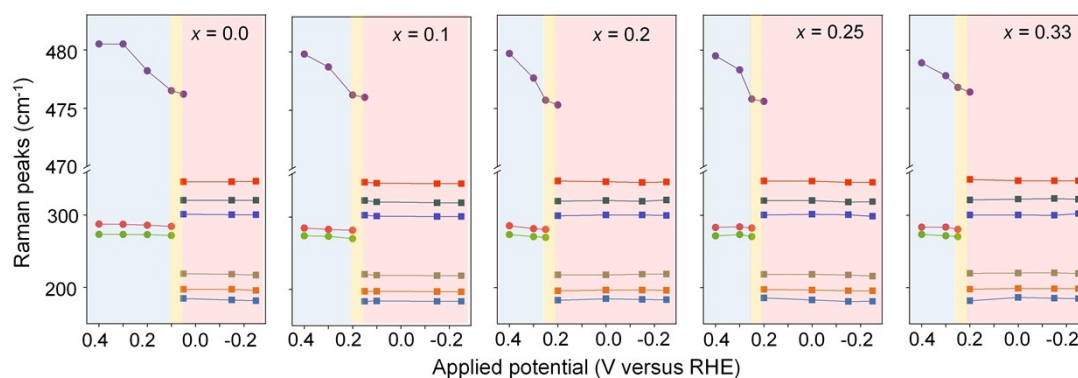

**Figure S8.** Frequency of the vibrational modes versus the applied potential obtained from the in-situ Raman spectra for  $\text{Ni}_{1-x}\text{Fe}_x\text{S}_2$ .

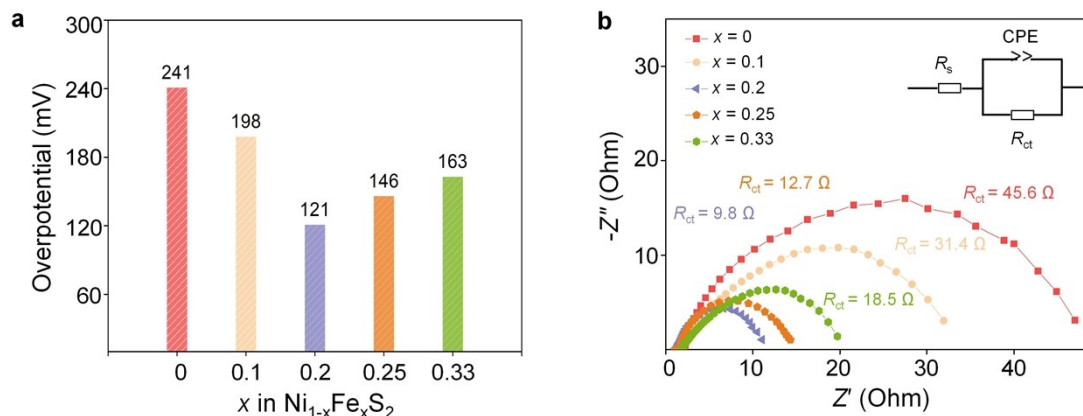

**Figure S9.** Electrochemical characterization of  $\text{Ni}_{1-x}\text{Fe}_x\text{S}_2$ . **a**, Overpotential of the nickel sulfide catalysts at the current density of  $10 \text{ mAcm}^{-2}$ , **b**, Nyquist plots of the catalyst electrode @150 mV overpotential in 1M KOH. Inset of (**b**) is the simplified Randles equivalent circuit model. The intercept in the high frequency zone is attributed to the internal charge-transfer resistances or the system resistance ( $R_s$ ) of electrodes, and the semicircles represent the charge transfer resistances ( $R_{ct}$ ) at the electrode/electrolyte interface. The charge-transfer resistances ( $R_{ct}$ ) measured at 150 mV overpotential are 45.6, 31.4, 9.8, 12.7 and  $18.5 \Omega$  for the CFP-supported pure  $\text{NiS}_2$ ,  $\text{Ni}_{0.9}\text{Fe}_{0.1}\text{S}_2$ ,  $\text{Ni}_{0.8}\text{Fe}_{0.2}\text{S}_2$ ,  $\text{Ni}_{0.75}\text{Fe}_{0.25}\text{S}_2$  and  $\text{Ni}_{0.67}\text{Fe}_{0.33}\text{S}_2$ , respectively.



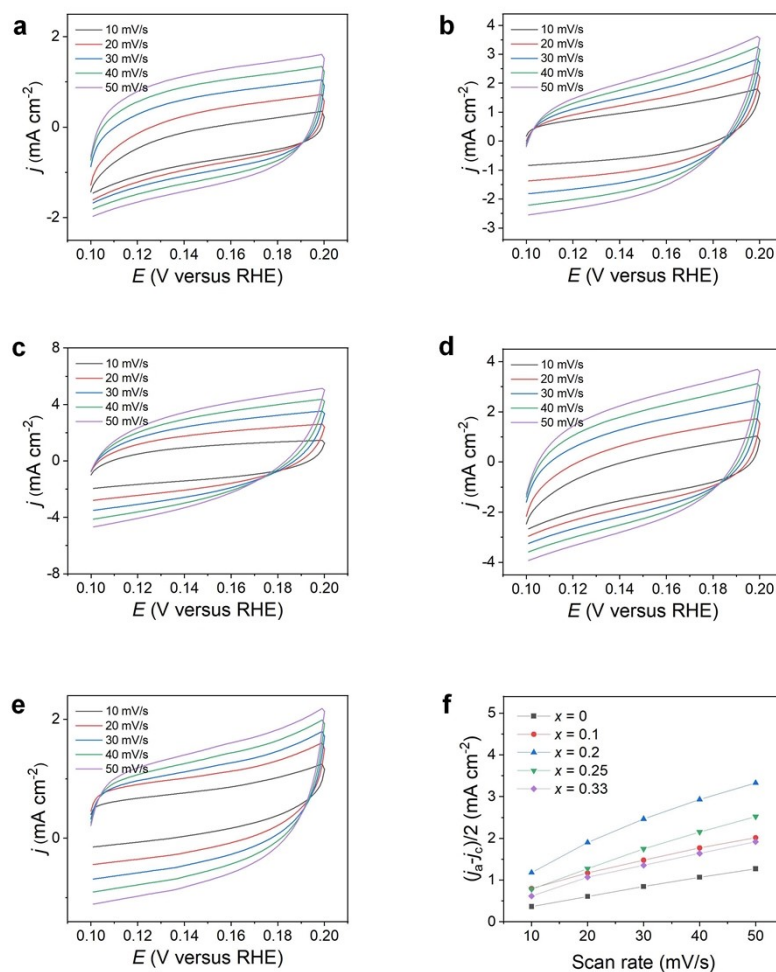

**Figure S10.** Cyclic voltammograms in the non-Faradaic potential region (0.1 to 0.2 V versus RHE) for the  $\text{Ni}_{1-x}\text{Fe}_x\text{S}_2$  (a,  $x = 0$ ; b,  $x = 0.1$ ; c,  $x = 0.2$ ; d,  $x = 0.25$ ; e,  $x = 0.33$ ) catalysts at different scan rates (10, 20, 30, 40, 50  $\text{mV s}^{-1}$ ). f, Charging current density differences at 0.15 V versus RHE plotted against scan rate. The value of  $C_{dl}$  was estimated from the slope of the linear relationship between the half capacitive current density  $((j_{\text{anodic}} - j_{\text{cathodic}})/2)$  at the middle of the applied potential range and the scan rates. Significantly,  $\text{Ni}_{0.8}\text{Fe}_{0.2}\text{S}_2$  yielded an extremely high  $C_{dl}$  value up to 53.28  $\text{mF cm}^{-2}$ , considerably larger than those of the  $\text{NiS}_2$  (22.7  $\text{mF cm}^{-2}$ ),  $\text{Ni}_{0.9}\text{Fe}_{0.1}\text{S}_2$  (30.38  $\text{mF cm}^{-2}$ ),  $\text{Ni}_{0.75}\text{Fe}_{0.25}\text{S}_2$  (43.59  $\text{mF cm}^{-2}$ ) and  $\text{Ni}_{0.67}\text{Fe}_{0.33}\text{S}_2$  (34.7  $\text{mF cm}^{-2}$ ).

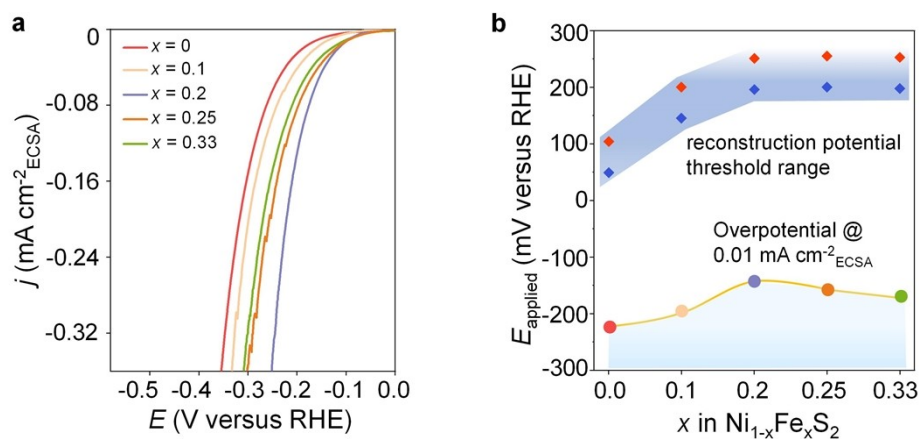

**Figure S11.** **a**, Normalized specific activities by ECSAs of various  $\text{Ni}_{1-x}\text{Fe}_x\text{S}_2$  catalysts. **b**, the surface reconstruction potential threshold range for  $\text{Ni}_{1-x}\text{Fe}_x\text{S}_2$  samples, and the corresponding intrinsic activity extracted from ECSA (overpotentials@0.01 mA cm<sup>-2</sup><sub>ECSA</sub>) of hydrogen evolution are plotted to show the dynamic correlation of structure-activity.

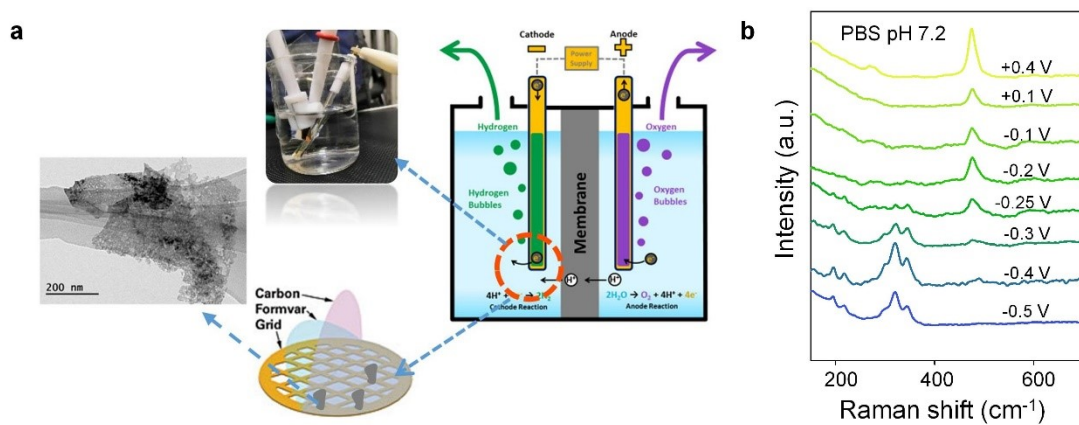

**Figure S12.** TEM characterization of surface-restructured nickel sulfide after the process of HER. **a**, Schematic process of HRTEM of nickel sulfide. **b**, In-situ Raman spectra of  $\text{NiS}_2$  at the potentials of 0.4 V ~ -0.5 V (vs. RHE) in 0.01M PBS (NaPi, pH7.2).

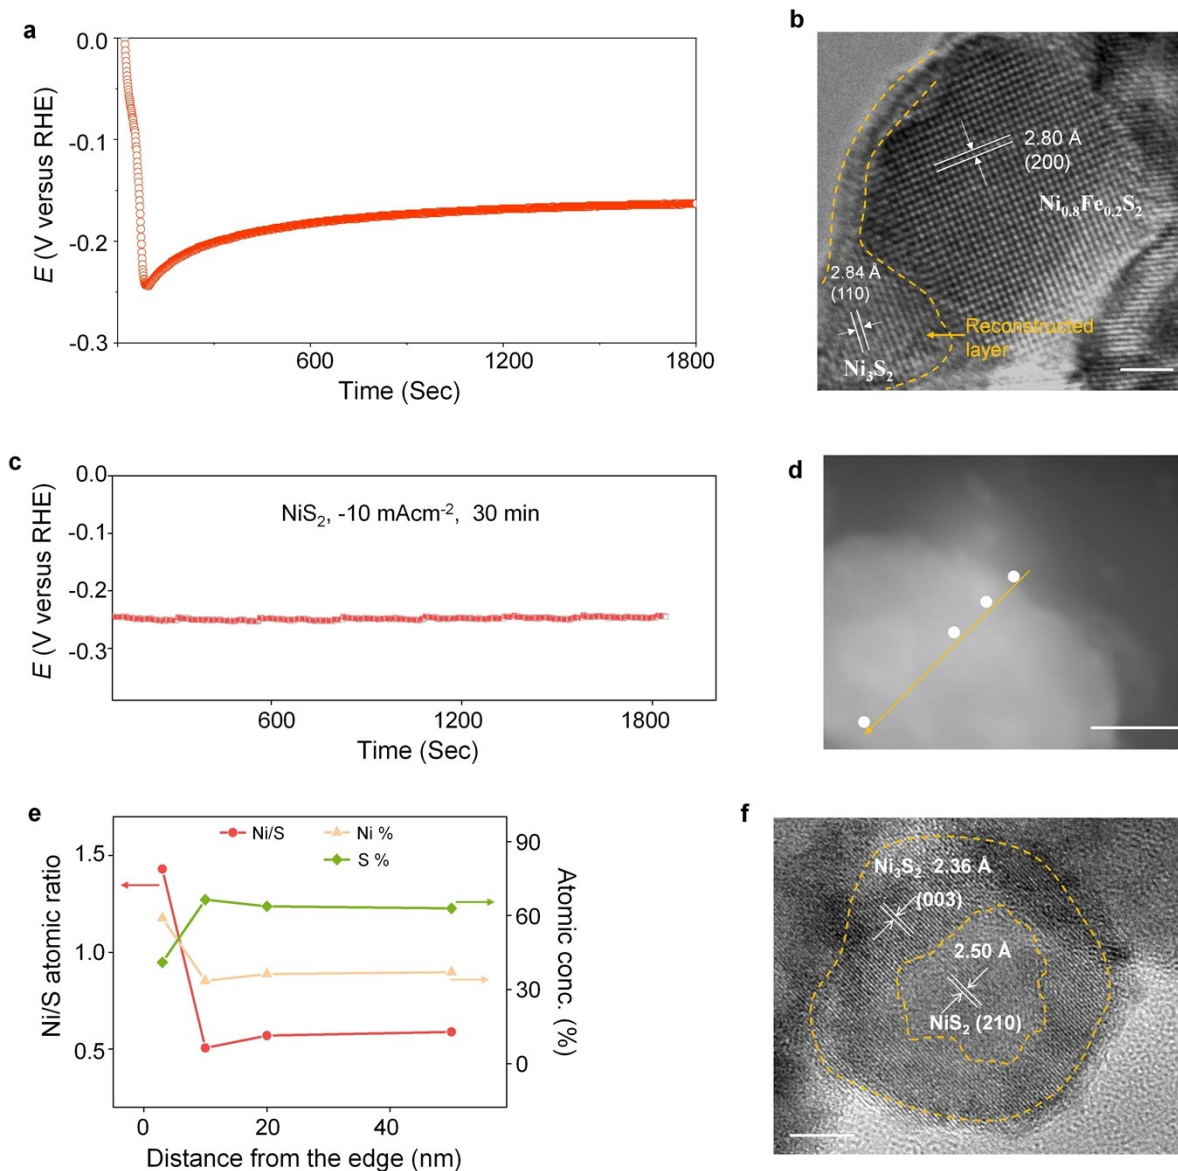

**Figure S13.** TEM characterization of surface-restructured nickel sulfide after the process of HER. The post-reaction catalysts attached to carbon fiber paper are obtained by using a sonicator. **a**, Chronopotentiometric curves obtained with  $\text{Ni}_{0.8}\text{Fe}_{0.2}\text{S}_2$  at constant current density of  $10 \text{ mA cm}^{-2}$ . **b**, HRTEM image of post-electrolysis  $\text{Ni}_{0.8}\text{Fe}_{0.2}\text{S}_2$ . Scale bar, 2 nm. **c**, Chronopotentiometric curves obtained with  $\text{NiS}_2$  at constant current density of  $10 \text{ mA cm}^{-2}$ . **d**, **e**, Elemental composition of post-electrolysis  $\text{NiS}_2$  determined from EDS at a series of spots along a line from the crystallite edge to the bulk reveals the variation in Ni:S composition across the crystallite, the marked points in (**d**) denote the scanning distance along the pathway in nm. **f**, HRTEM image of post-electrolysis  $\text{NiS}_2$ . The scale bars are 20 nm in (**d**), 5 nm in (**f**).

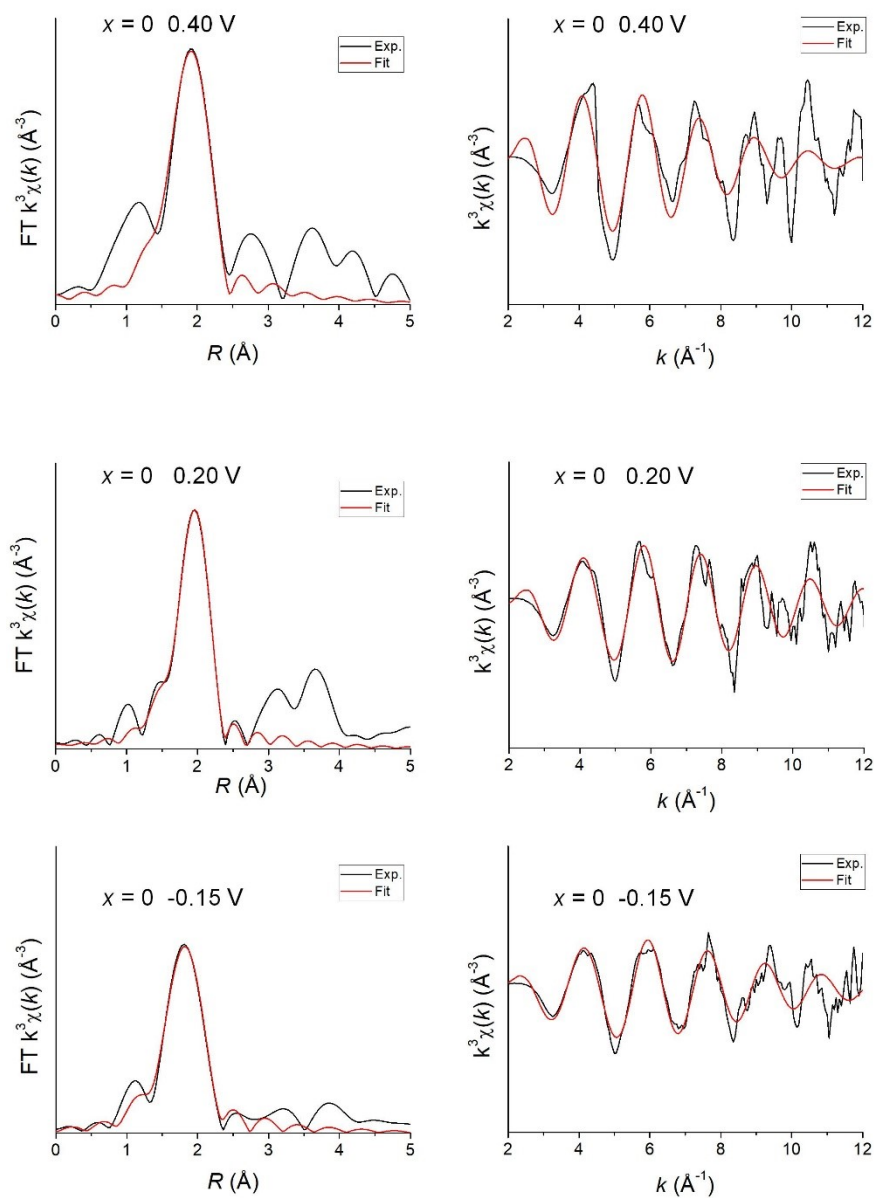

**Figure S14.** Ni K-edge EXAFS analysis of nickel sulfide in  $R$  and  $k$  spaces. FT-EXAFS spectra and fits of Ni K-edges from  $\text{NiS}_2$  (in -0.15 V, 0.20 V and 0.40 V vs. RHE). The black lines represent the experiment data and the red lines represent the fitting values.

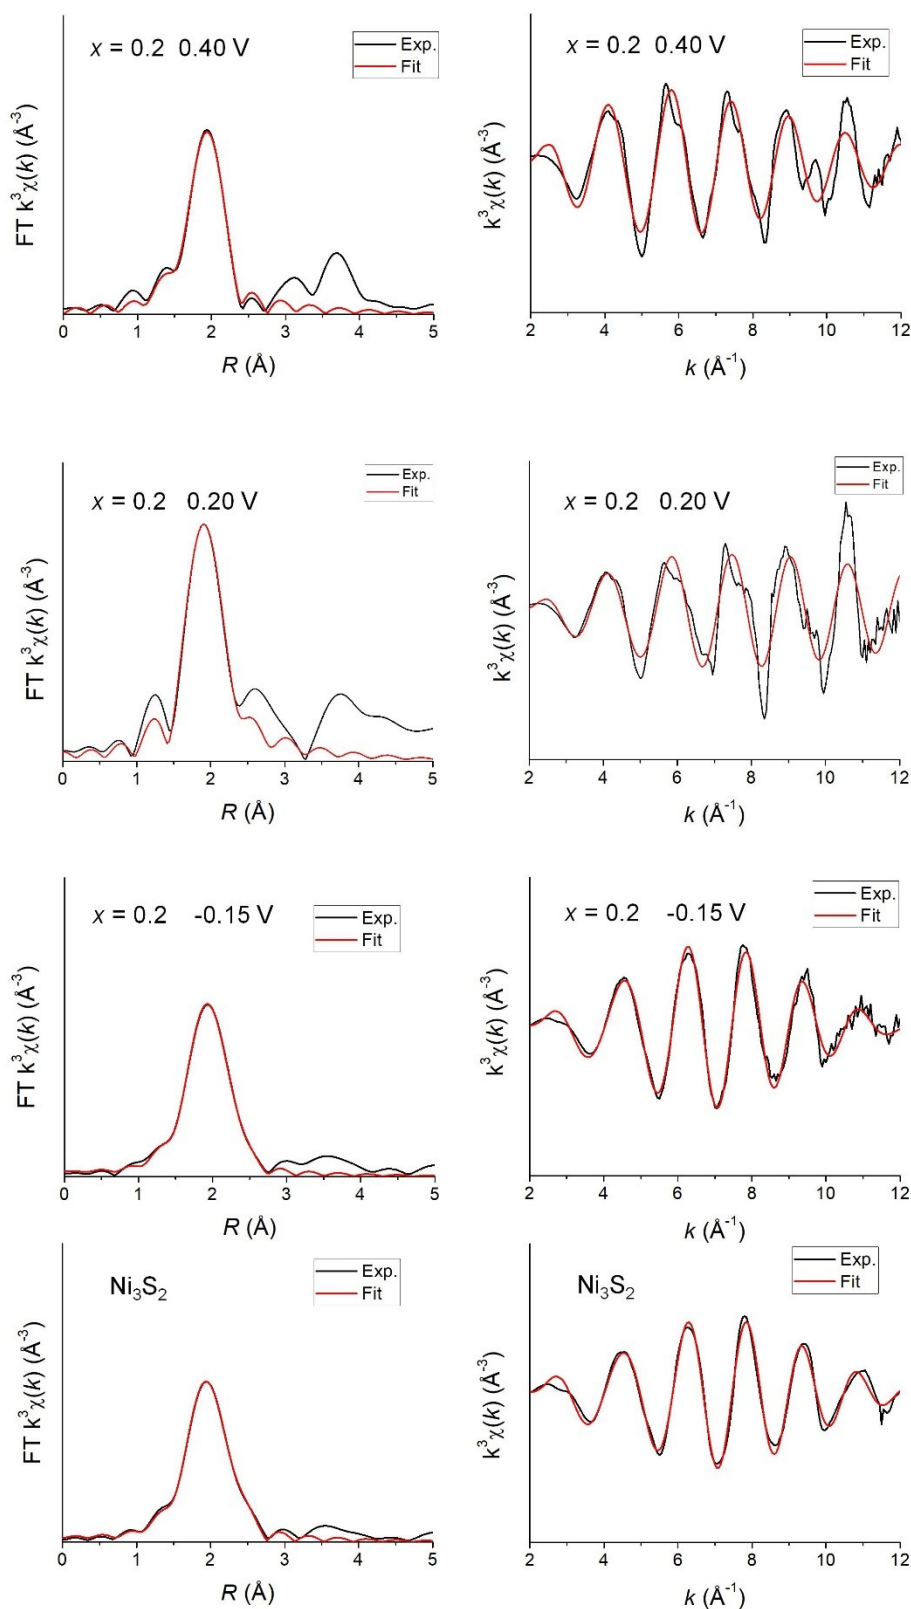

**Figure S15.** Ni K-edge EXAFS analysis of nickel sulfide in  $R$  and  $k$  spaces. FT-EXAFS spectra and fits of Ni K-edges from  $\text{Ni}_3\text{S}_2$  catalysts and  $\text{Ni}_{0.8}\text{Fe}_{0.2}\text{S}_2$  (in -0.15 V, 0.20 V and 0.40 V vs. RHE). The black lines represent the experiment data and the red lines represent the fitting values.

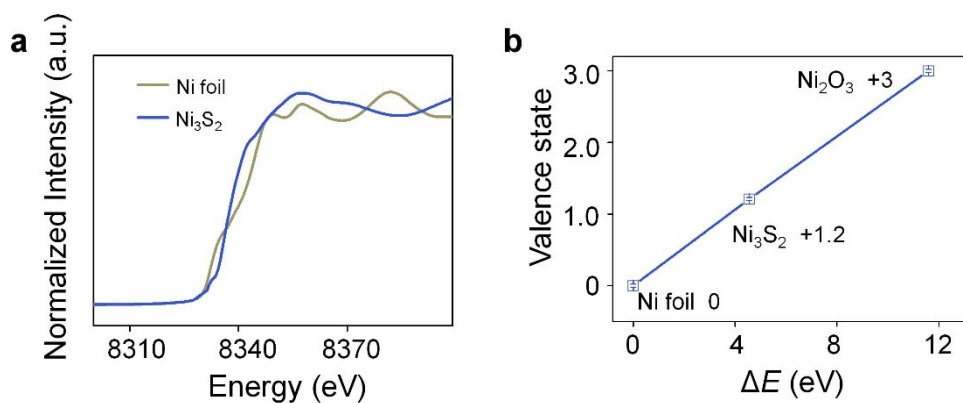

**Figure S16.** XAFS measurements. **a**, **b** is the  $\text{Ni}_3\text{S}_2$  XANES spectra and the corresponding valence state of Ni in  $\text{Ni}_3\text{S}_2$  according to the linear relationship described in (**b**). Error bars represent the standard deviation from at least three independent measurements. The average valence state of nickel foil and  $\text{Ni}_2\text{O}_3$  is fitted to 0 and +3 by the Nickel K-edge XANES in Figure S4. Applying the linear correlation, it was found that the average valence state of Ni for  $\text{Ni}_3\text{S}_2$  is approximately +1.20.



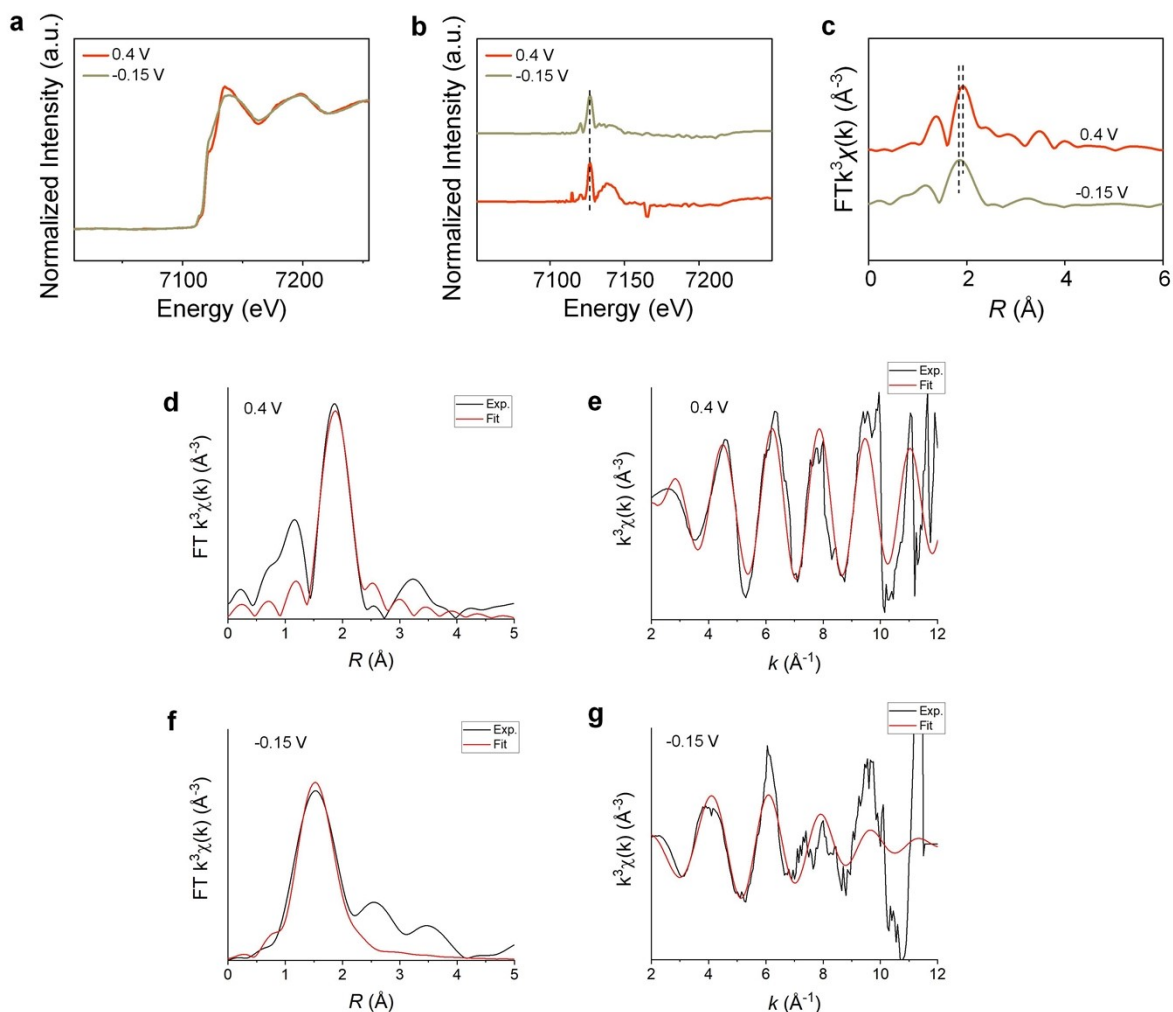

**Figure S17.** Operando XAFS spectra characterization of  $\text{Ni}_{0.8}\text{Fe}_{0.2}\text{S}_2$  catalysts. **a**, Normalized operando Fe K-edge XANES analysis at 0.40 and -0.15 V (vs. RHE). **b**, Normalized difference spectra for Fe K-edge XANES. **c**, the corresponding operando FT  $k^3$ -weighted EXAFS. **d ~ g**, FT-EXAFS spectra and fits of Fe K-edges in  $R$  and  $k$  spaces. The black lines represent the experiment data and the red lines represent the fitting values.

Absorption Fe K-edges of  $\text{Ni}_{0.8}\text{Fe}_{0.2}\text{S}_2$  present insignificant shift with the potential increase cathodically, clearly explaining the valence state of Fe keep stable at 2+ during HER process. Compared with the profiles collected at 0.4 V vs. RHE from the FT-EXAFS spectra in  $R$ -space, the Fe-S bond peak decrease at -0.15 V vs. RHE, indicating Fe atom accumulating in  $\text{Fe-S}_4$  tetrahedral coordination resulted from reconstruction. For fitting results (Figure S17 d~g), the Fe-S CN decreases from  $4.6 \pm 1.1$  to  $3.3 \pm 1.9$  for  $\text{Ni}_{0.8}\text{Fe}_{0.2}\text{S}_2$  at 0.20 and -0.15 V (Table S3). Similarly, the Fe-S bond ( $2.2 \text{ \AA} \pm 0.03$ ) of  $\text{Ni}_{0.8}\text{Fe}_{0.2}\text{S}_2$  at -0.15 V is decreased from  $2.3 \text{ \AA} \pm 0.03$ .

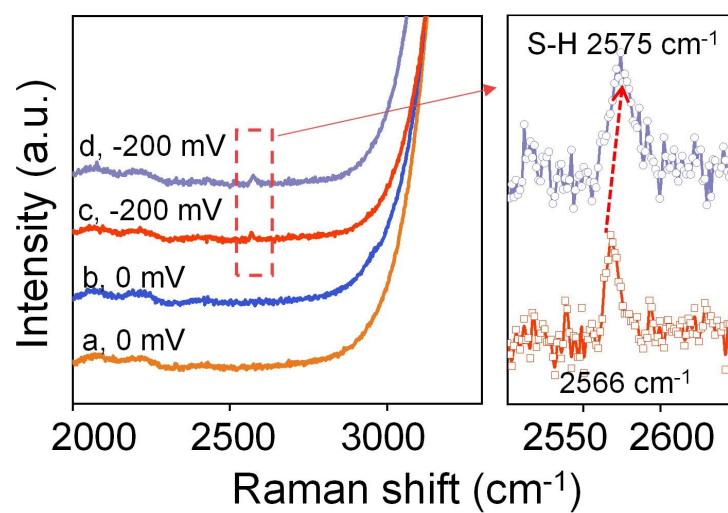

**Figure S18.** In-situ Raman spectra of catalysts at the overpotential of 0 mV and -200 mV from 2000 to 3300  $\text{cm}^{-1}$ . a,  $\text{NiS}_2$  at 0 mV. b,  $\text{Ni}_{0.8}\text{Fe}_{0.2}\text{S}_2$  at 0 mV. c,  $\text{NiS}_2$  at -200 mV. d,  $\text{Ni}_{0.8}\text{Fe}_{0.2}\text{S}_2$  at -200 mV.

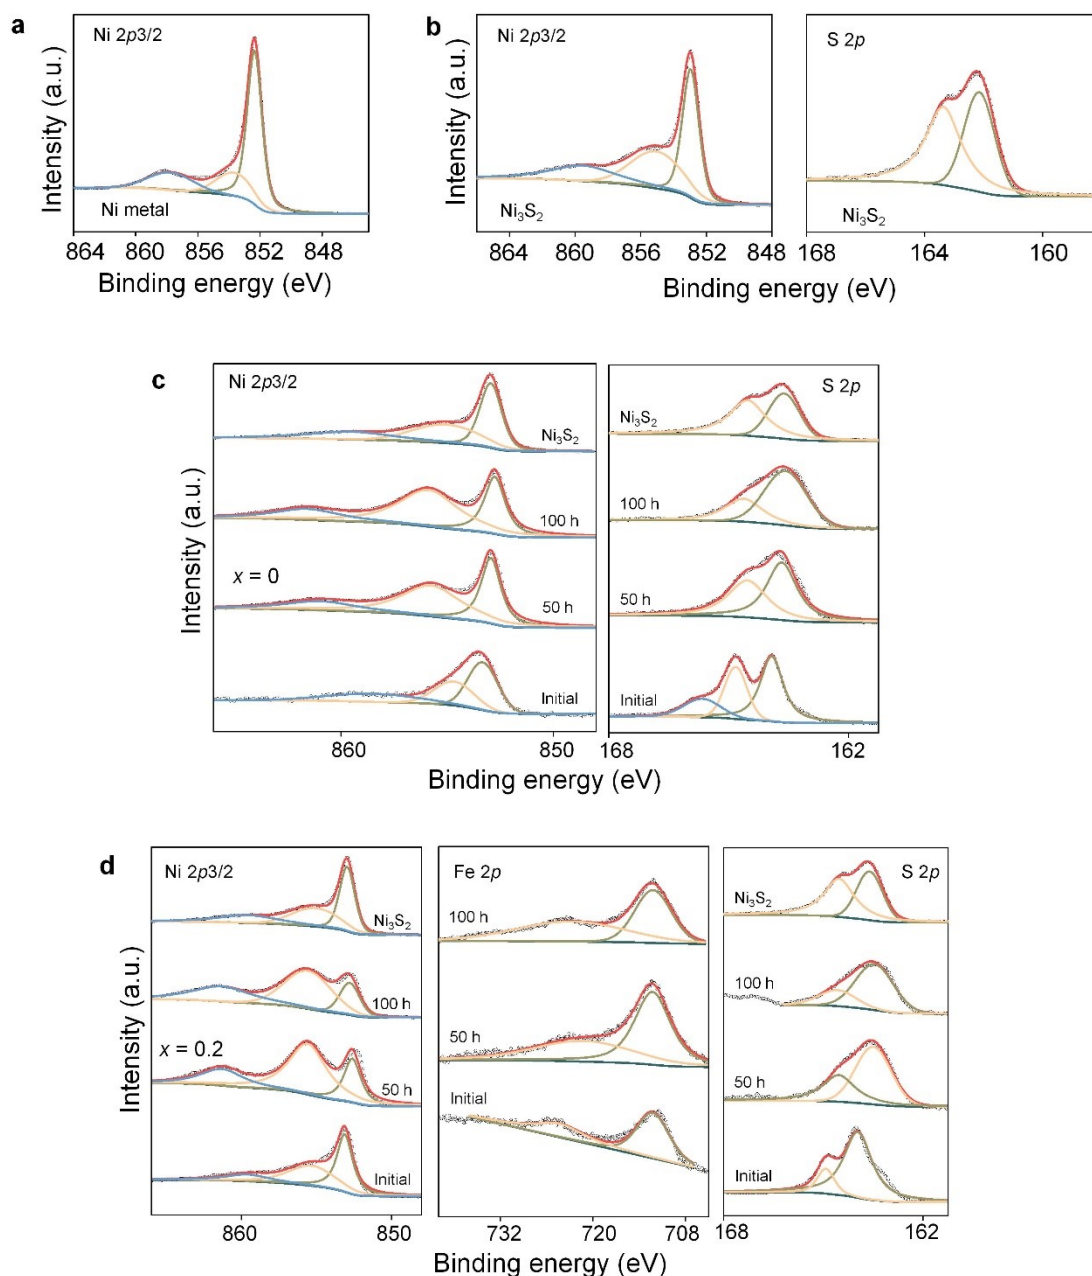

**Figure S19.** XPS Characterization. **a**, Ni 2p<sub>3/2</sub> region of Ni Metal. **b**, Ni 2p<sub>3/2</sub> and S 2p regions of Ni<sub>3</sub>S<sub>2</sub>. The Ni metal peak is at 852.30 eV, and the Ni peak of Ni<sub>3</sub>S<sub>2</sub> is about at 852.85 eV. **c**, **d**, XPS analysis of catalysts after long-term operation to identify the binding energy and ratio of the surface element for NiS<sub>2</sub> (**c**) and Ni<sub>0.8</sub>Fe<sub>0.2</sub>S<sub>2</sub> (**d**). At 50 h and 100 h, the Ni 2p<sub>3/2</sub> binding energy is approaching to Ni in Ni<sub>3</sub>S<sub>2</sub>, while for Fe, the binding energy is slightly changed. For the Ni 2p<sub>2/3</sub>, the peaks after 50 h and 100 h were all verge on the corresponding peaks of the Ni<sub>3</sub>S<sub>2</sub> crystal, implying the finalized phase of the long-term service also close to Ni<sub>3</sub>S<sub>2</sub> structure.

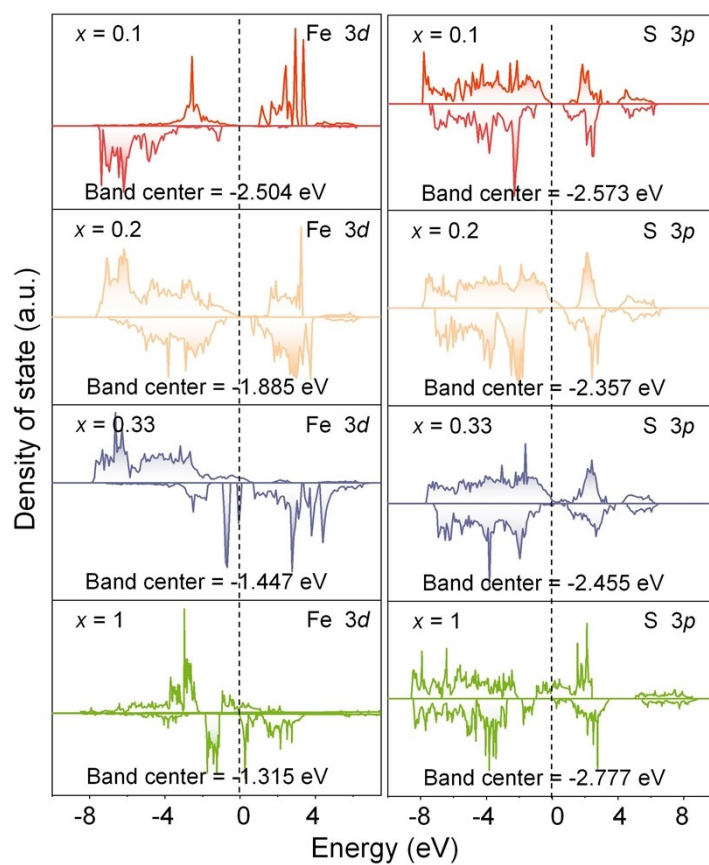

**Figure S20.** Computed Fe 3d, S 3p PDOS of  $\text{Ni}_{1-x}\text{Fe}_x\text{S}_2$  ( $x = 0.1, 0.2, 0.33, 1$ ).  $x = 1$  stand for  $\text{FeS}_2$  catalysts.

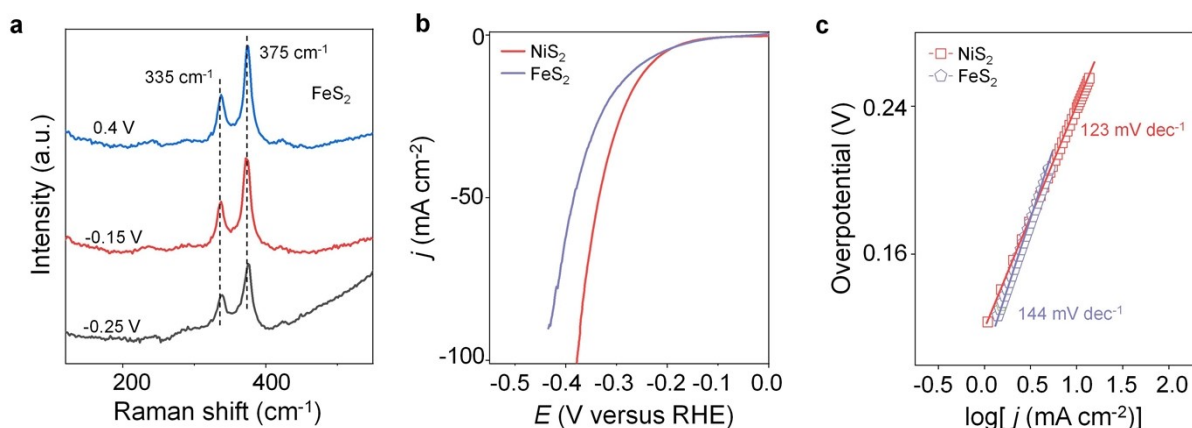

**Figure S21.** **a**, In-situ Raman spectra of  $\text{FeS}_2$  (at  $335\text{cm}^{-1}$  and  $375\text{cm}^{-1}$ ) samples at the potentials of  $0.4\sim-0.25$  V (vs. RHE) in 1M KOH. **b**, HER polarization curves of  $\text{NiS}_2$  and  $\text{FeS}_2$  catalysts on carbon fiber paper in  $\text{N}_2$ -saturated 1M KOH, **c**, Corresponding HER Tafel plots derived from the polarization curves.

As displayed in Figure S2, the diffraction peaks by XRD of as-prepared  $\text{Ni}_{1-x}\text{Fe}_x\text{S}_2$  ( $x \approx 0\sim 0.33$ ) appeared the segregation of  $\text{FeS}_2$ , when  $x \geq 0.25$ . In order to evaluate the phase evolution process and the performance of HER for  $\text{FeS}_2$ , we prepared  $\text{FeS}_2$  catalysts based on the preparation methods of  $\text{NiS}_2$  catalysts in the manuscript. Figure S21a presented that the as-prepared  $\text{FeS}_2$  catalysts remained the structure stable at  $-0.25$  V vs. RHE and did not undergo the phase transition process during the HER process. Further analysis of the polarization curve and the Tafel slope in Figure S21 b, c, it showed that the HER activity was inferior for  $\text{FeS}_2$  catalysts for comparing with  $\text{NiS}_2$ .

The formation of inferior  $\text{FeS}_2$  might impact the phase transition process of nickel sulfides to generate different active species. Indeed, the declined ECSA for nickel sulfides of  $x = 0.25$  and  $0.33$  ( $\text{Ni}_{0.8}\text{Fe}_{0.2}\text{S}_2$ ,  $53.28\text{ mF cm}^{-2}$ ;  $\text{Ni}_{0.75}\text{Fe}_{0.25}\text{S}_2$ ,  $43.59\text{ mF cm}^{-2}$  and  $\text{Ni}_{0.67}\text{Fe}_{0.33}\text{S}_2$ ,  $34.7\text{ mF cm}^{-2}$ ) established this. Therefore, when the Fe doping content was greater than 20%, the electrochemical activity of HER was declined.

Moreover, excessive Fe substitution ( $x \geq 0.25$ ) in  $\text{Ni}_{1-x}\text{Fe}_x\text{S}_2$  could make a small part of  $\text{FeS}_2$  segregation, and the remaining Fe existed in the active structure ( $\text{Ni}_3\text{S}_2$ ) after the phase transition process, which could also induce a great effect on the HER performance (discussed in Figure S22).

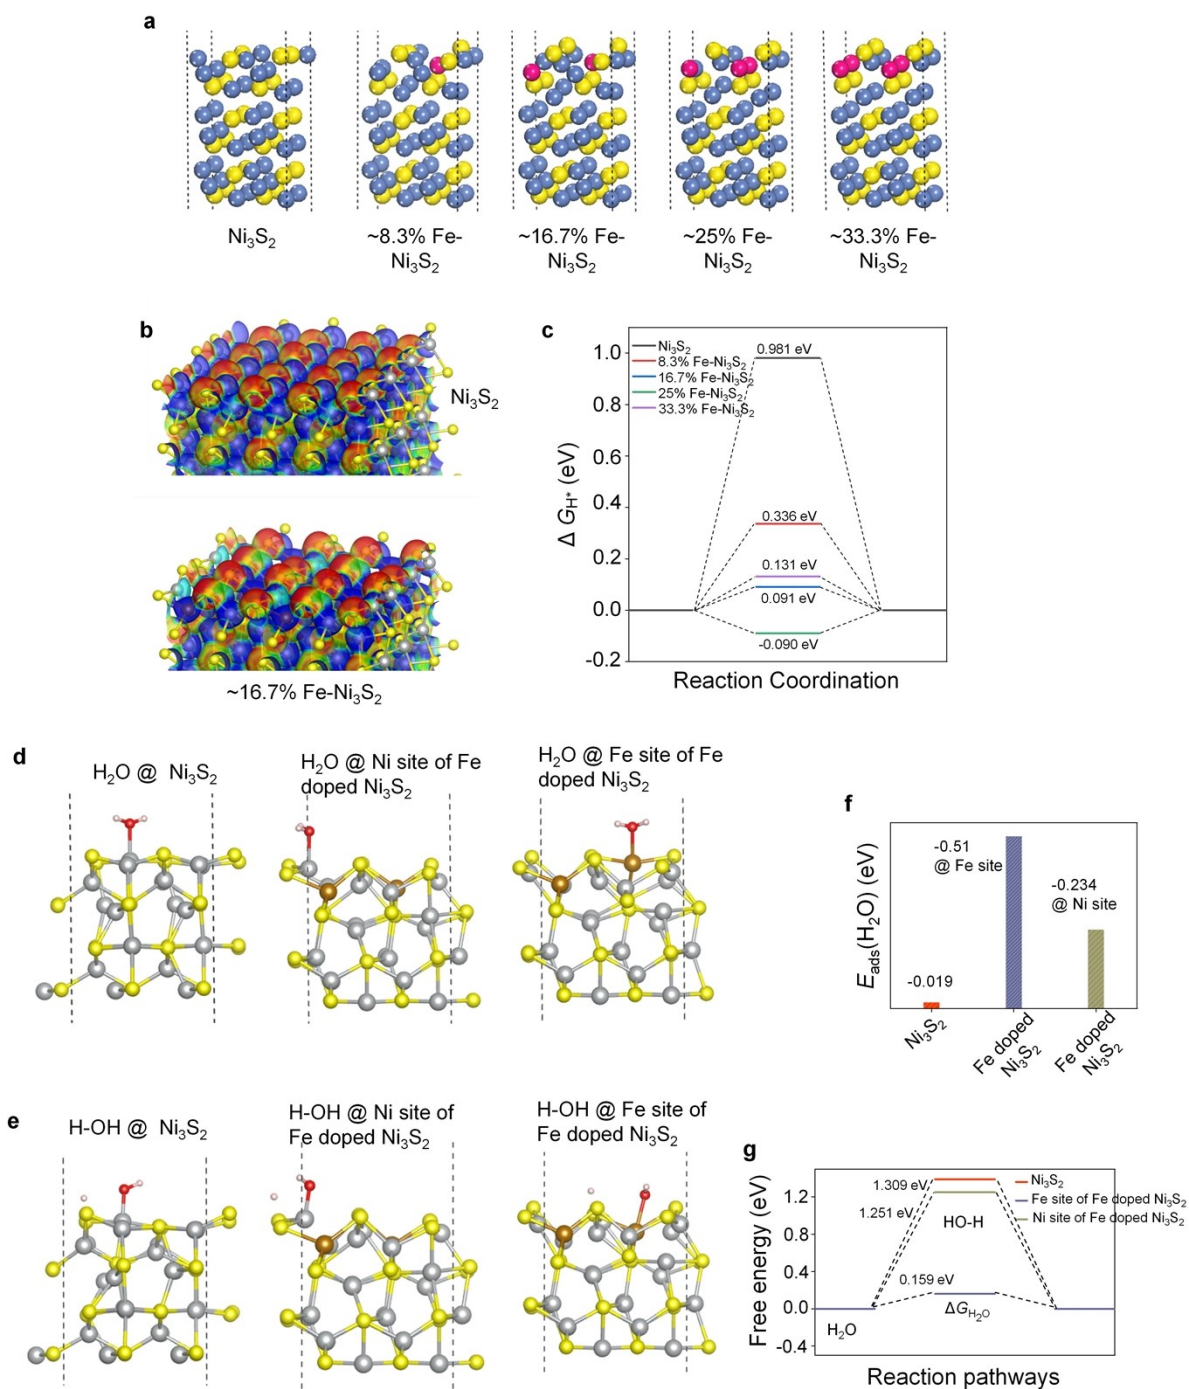

**Figure S22.** **a**, The illustrations of  $\text{Ni}_3\text{S}_2$  (101) and the Fe-doped  $\text{Ni}_3\text{S}_2$  structure with different doping concentration for calculation. **b**, Electrodensity isosurface of ideal  $\text{Ni}_3\text{S}_2$  (101) and 16.7% Fe doped  $\text{Ni}_3\text{S}_2$  (101). The electron-density isosurfaces are plotted at  $0.02 e \text{ bohr}^{-3}$ . Red color means lower electrostatic potential, blue color means higher electrostatic potential. **c**, Calculated free-energy diagram of HER. **d**, **e**, Water adsorption and dissociation pathways and relevant structures on different substrates. **f**, The calculated adsorption free energy changes of  $\text{H}_2\text{O}$  on  $\text{Ni}_3\text{S}_2$  and 16.7% Fe doped  $\text{Ni}_3\text{S}_2$ . **g**, The Gibbs free energy change for formation of H-OH intermediates ( $\Delta G_{\text{H}_2\text{O}}$ , water dissociation step) of catalysts.



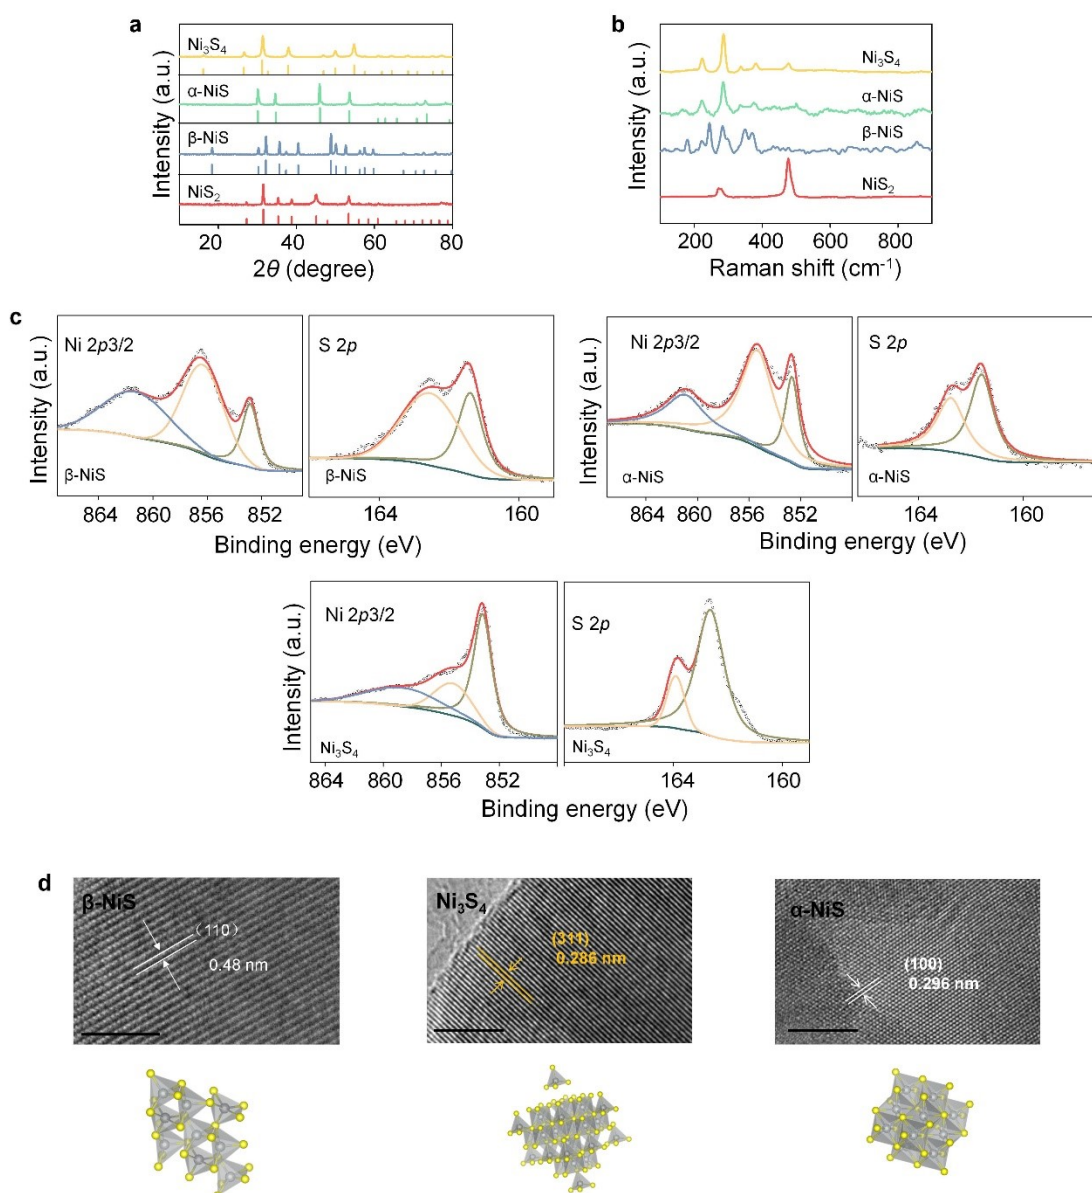

**Figure S23.** Structure Characterization of  $\alpha$ -NiS,  $\beta$ -NiS  $\text{Ni}_3\text{S}_4$ . **a**, PXRD. **b**, Raman spectra. The Raman peaks were shown in Supplementary Table 4. **c**, XPS analysis of the electrodes of  $\alpha$ -NiS,  $\beta$ -NiS and  $\text{Ni}_3\text{S}_4$ . **d**, HRTEM characterization of  $\alpha$ -NiS,  $\beta$ -NiS and  $\text{Ni}_3\text{S}_4$  and the lattice structure of each nickel sulfides. Scale bars, 5 nm. For spinel structure of  $\text{Ni}_3\text{S}_4$ , there was two arrangement of Ni atom and S atom to consist octahedron polyhedral of Ni with six S around and tetrahedron polyhedral of Ni with four S. For  $\beta$ -NiS, there was five S around Ni atom to consist pyramidal polyhedral. For the  $\alpha$ -NiS, the Ni atom was around with six S atom to consist octahedron polyhedral.



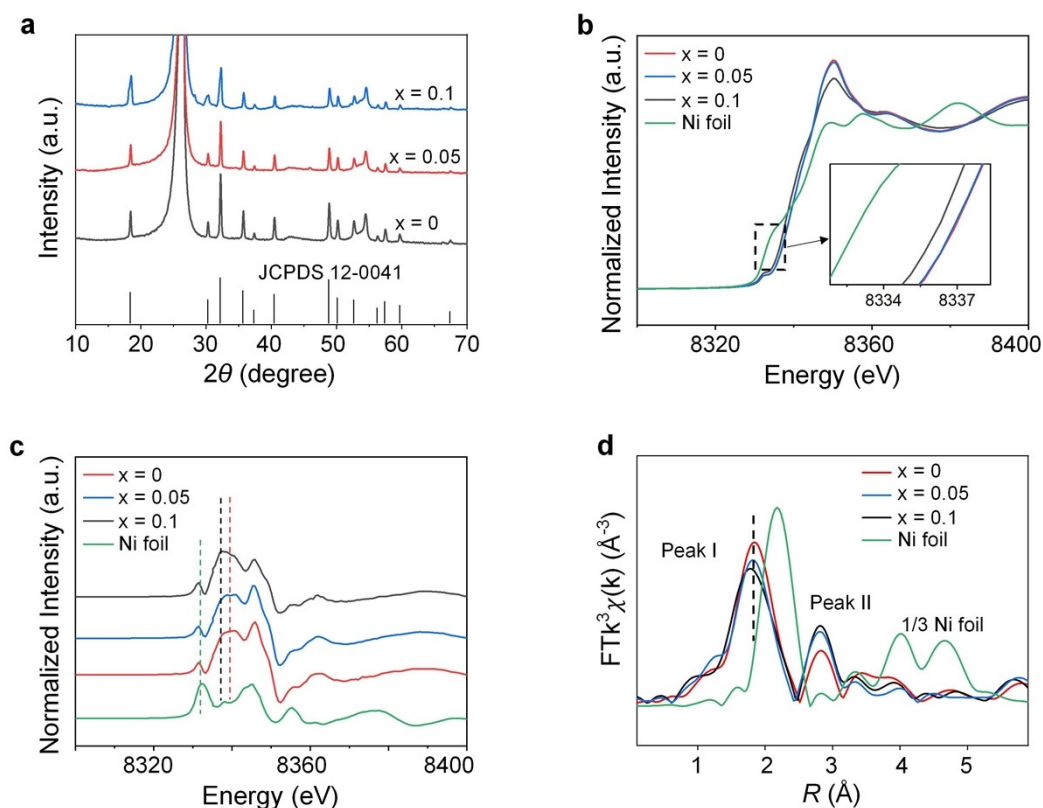

**Figure S24.** Structural characterizations of as-prepared  $\beta$ - $\text{Ni}_{1-x}\text{Fe}_x\text{S}$  catalysts. **a**, XRD patterns of synthesized  $\beta$ - $\text{Ni}_{1-x}\text{Fe}_x\text{S}$  ( $x \approx 0\sim 0.1$ ) samples. **b**, Normalized Ni K-edge XANES analysis of  $\beta$ - $\text{Ni}_{1-x}\text{Fe}_x\text{S}$  samples with Ni foil as reference. Inset, Magnified pre-edge XANES region. **c**, Normalized difference spectra for Ni K-edge XANES. **d**, The corresponding  $k^3$ -weighted Fourier transform (FT) Ni K-edge EXAFS spectra. Peaks I and II in the FT-EXAFS plots are assigned to Ni-S and Ni-Ni bonds, respectively.

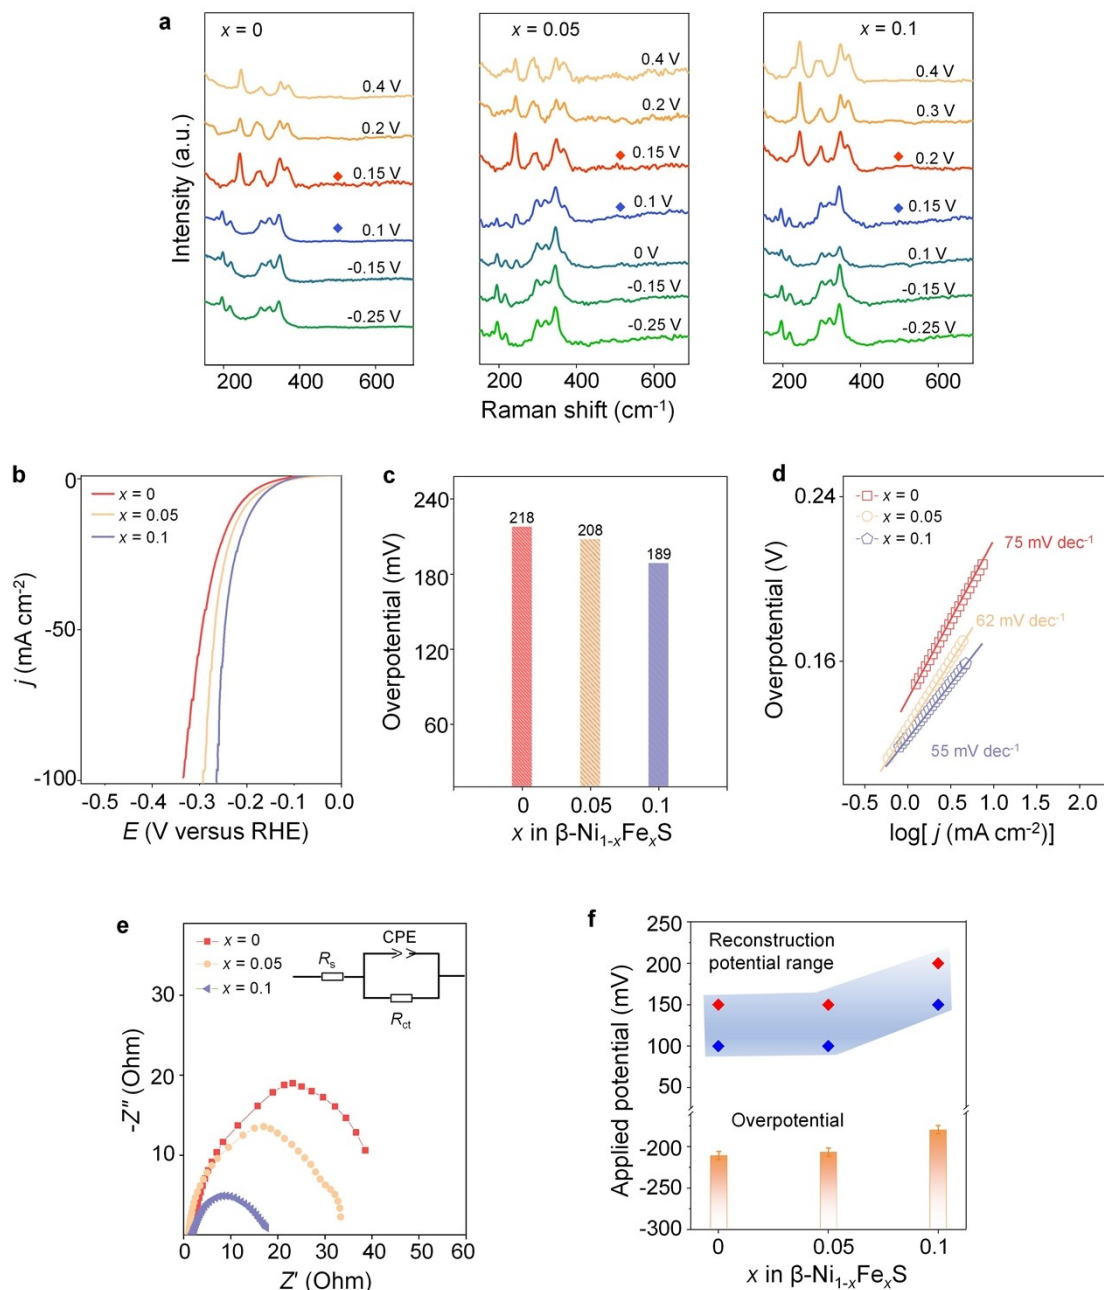

**Figure S25.** **a**, In-situ Raman spectra of  $\beta\text{-Ni}_{1-x}\text{Fe}_x\text{S}$  ( $x = 0, 0.05, 0.1$ ) samples. The red diamond dots represent the final potential of existence for Raman peaks of  $\beta\text{-Ni}_{1-x}\text{Fe}_x\text{S}$  structures, and the blue diamond dots stand for the potential of emerging of  $\text{Ni}_3\text{S}_2$  Raman peaks. **b**, HER polarization curves of  $\beta\text{-Ni}_{1-x}\text{Fe}_x\text{S}$  catalysts. **c**, Overpotential of the nickel sulfide catalysts at the current density of  $10 \text{ mA cm}^{-2}$ . **d**, Corresponding HER Tafel plots derived from the polarization curves. **e**, Nyquist plots of the catalyst electrode @200 mV overpotential. Inset of (e) is the simplified Randles equivalent circuit model. **f**, The surface reconstruction potential threshold range for  $\beta\text{-Ni}_{1-x}\text{Fe}_x\text{S}$  ( $x = 0, 0.05, 0.1$ ) samples, and the corresponding overpotentials (@10  $\text{mA cm}^{-2}$ ) are plotted to show the dynamic correlation of structure-activity.

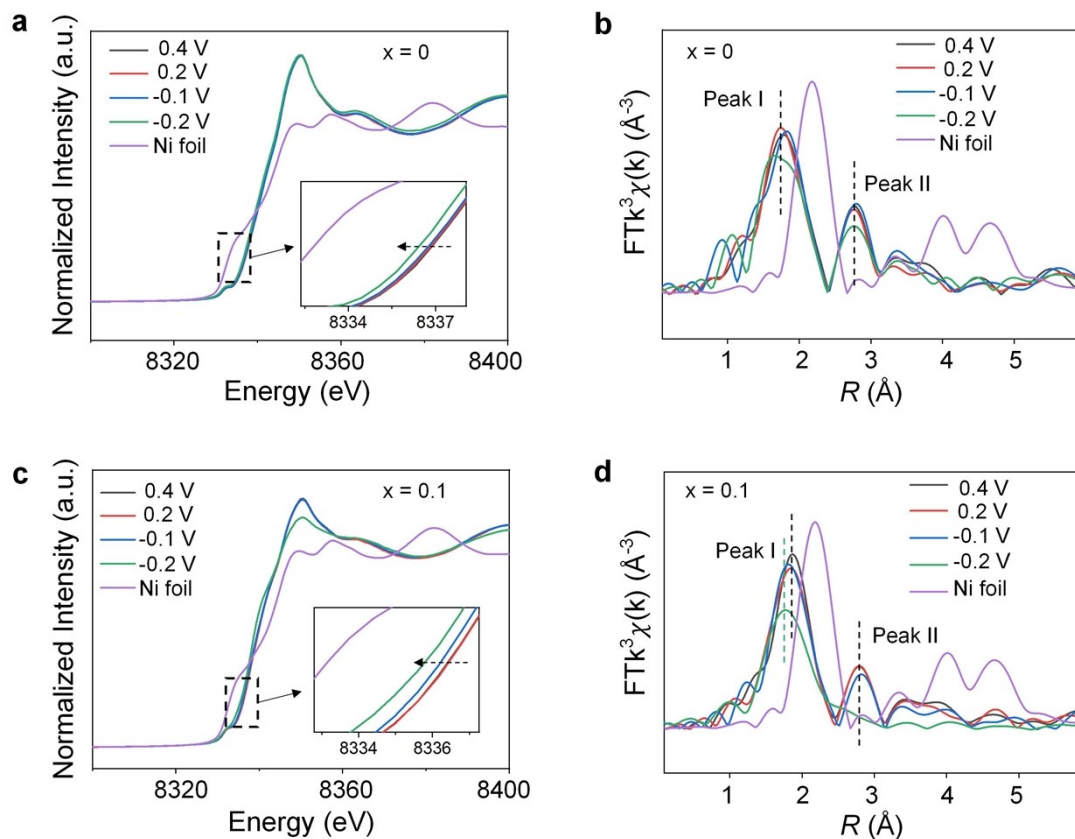

**Figure S26.** Operando XAFS characterization of catalysts. **a**, Normalized operando Ni K-edge XANES analysis of  $\beta$ -NiS ( $x = 0$ ) at 0.40, 0.20, -0.1 and -0.2 V (vs. RHE) with Ni Foil as reference. Inset, Magnified pre-edge XANES region. **b**, The corresponding operando FT  $k^3$ -weighted Ni K-edge EXAFS of  $\beta$ -NiS ( $x = 0$ ). **c**, Normalized operando Ni K-edge XANES analysis of  $\beta$ -Ni<sub>0.9</sub>Fe<sub>0.1</sub>S ( $x = 0.1$ ) at 0.40, 0.20, -0.1 and -0.2 V (vs. RHE) with Ni Foil as reference. Inset, Magnified pre-edge XANES region. **d**, The corresponding operando FT  $k^3$ -weighted Ni K-edge EXAFS of  $\beta$ -Ni<sub>0.9</sub>Fe<sub>0.1</sub>S ( $x = 0.1$ ).

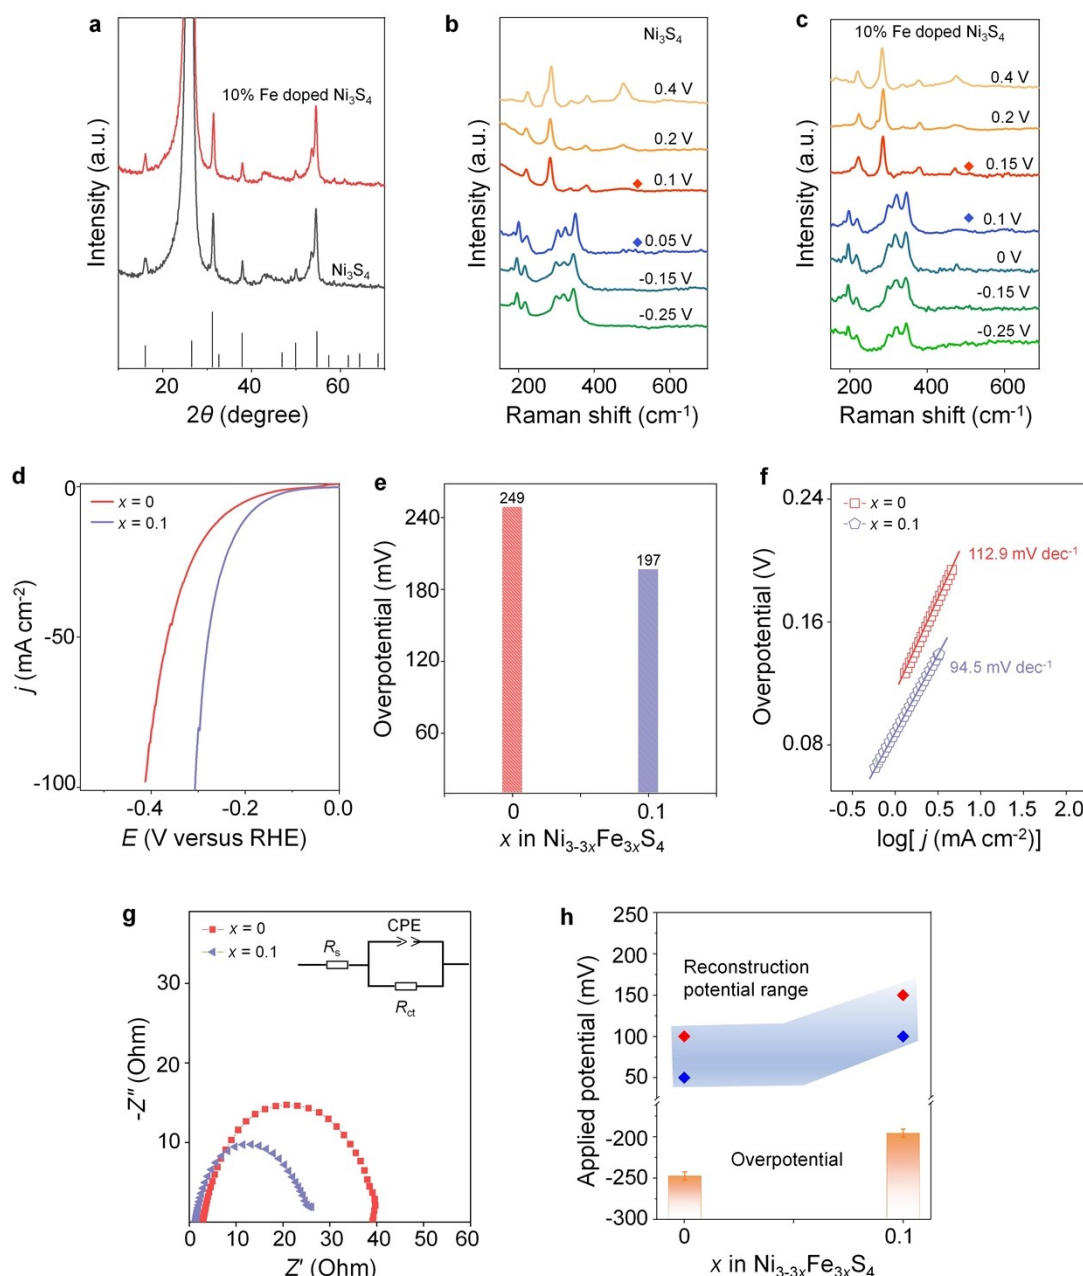

**Figure S27.** **a**, XRD patterns of synthesized  $\text{Ni}_{3-3x}\text{Fe}_{3x}\text{S}_4$  ( $x = 0, 0.1$ ) samples. **b, c**, In-situ Raman spectra of  $\text{Ni}_{3-3x}\text{Fe}_{3x}\text{S}_4$  ( $x = 0, 0.1$ ). The red diamond dots represent the final potential of existence for Raman peaks of  $\text{Ni}_{3-3x}\text{Fe}_{3x}\text{S}_4$  structures, and the blue diamond dots stand for the potential of emerging of  $\text{Ni}_3\text{S}_2$  Raman peaks. **d**, HER polarization curves of  $\text{Ni}_{3-3x}\text{Fe}_{3x}\text{S}_4$  catalysts. **e**, Overpotential of the nickel sulfide catalysts at the current density of  $10 \text{ mAcm}^{-2}$ . **f**, Corresponding HER Tafel plots. **g**, Nyquist plots of the catalyst electrode @200 mV overpotential. Inset of (**g**) is the simplified Randles equivalent circuit model. **h**, the surface reconstruction potential threshold range for  $\text{Ni}_{3-3x}\text{Fe}_{3x}\text{S}_4$  ( $x = 0, 0.1$ ) samples, and the corresponding overpotentials (@10  $\text{mAcm}^{-2}$ ) are plotted to show the dynamic correlation of structure-activity.

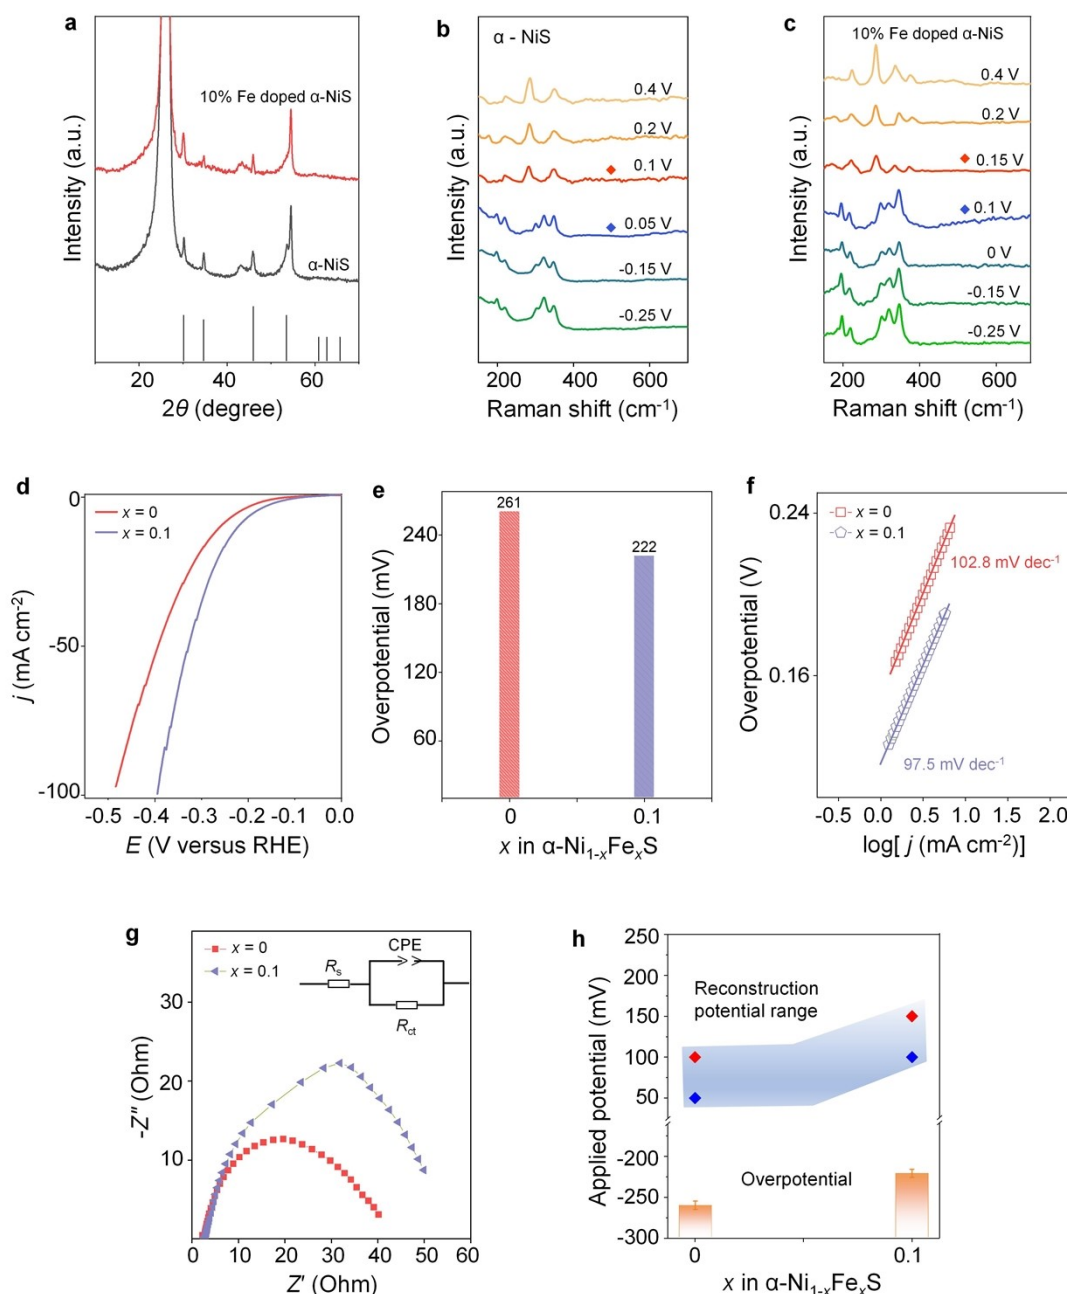

**Figure S28.** **a**, XRD patterns of synthesized  $\alpha\text{-Ni}_{1-x}\text{Fe}_x\text{S}$  ( $x = 0, 0.1$ ). **b, c**, In-situ Raman spectra of  $\alpha\text{-Ni}_{1-x}\text{Fe}_x\text{S}$  ( $x = 0, 0.1$ ) samples. The red diamond dots represent the final potential of existence for Raman peaks of  $\alpha\text{-Ni}_{1-x}\text{Fe}_x\text{S}$  structures, and the blue diamond dots stand for the potential of emerging of  $\text{Ni}_3\text{S}_2$  Raman peaks. **d**, HER polarization curves of  $\alpha\text{-Ni}_{1-x}\text{Fe}_x\text{S}$  catalysts. **e**, Overpotentials at the current density of 10  $\text{mA cm}^{-2}$ . **f**, Corresponding HER Tafel plots derived from the polarization curves. **g**, Nyquist plots of the catalyst electrode @200 mV overpotential. Inset of (**g**) is the simplified Randles equivalent circuit model. **h**, the surface reconstruction potential threshold range for  $\alpha\text{-Ni}_{1-x}\text{Fe}_x\text{S}$  ( $x = 0, 0.1$ ) samples, and the corresponding overpotentials (@10  $\text{mA cm}^{-2}$ ) are plotted to show the dynamic correlation of structure-activity.

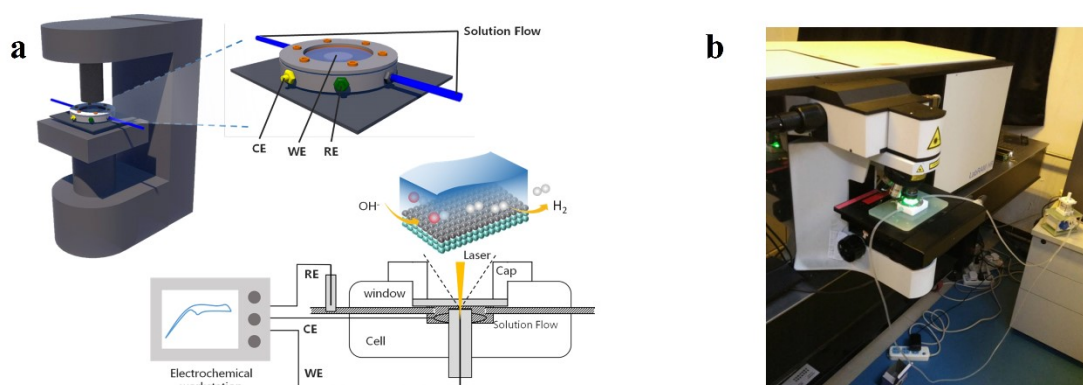

**Figure S29.** Equipment used for in-situ Raman measurements. **a**, Schematic for the equipment used for in-situ Raman. **b**, Digital photo taken during in-situ Raman.

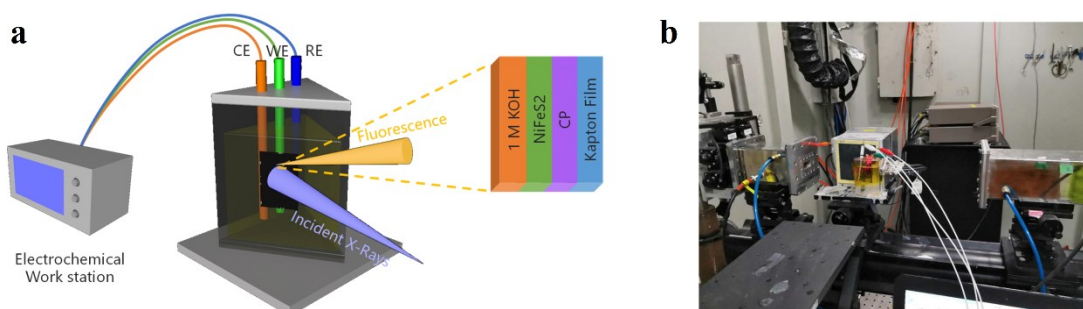

**Figure S30.** Equipment used for operando XAFS measurements. **a**, Schematic for the equipment used for operando XAFS measurements. **b**, Digital photo taken during operando XAFS measurement.





## Supporting Tables

**Table S1.** The Ni and Fe K-edge positions, nominal Ni and Fe valence state and the nominal sulphur vacancy concentration ( $\delta$ ) in  $\text{Ni}_{1-x}\text{Fe}_x\text{S}_{2-\delta}$ .

| Samples                 | Fe k-edge        |                       | Samples                 | Ni k-edge        |                       | Nominal sulphur vacancy concentration ( $\delta$ )                       |
|-------------------------|------------------|-----------------------|-------------------------|------------------|-----------------------|--------------------------------------------------------------------------|
|                         | Edge energy (eV) | Nominal Valence state |                         | Edge energy (eV) | Nominal Valence state |                                                                          |
| Fe foil                 | 7112.00          | 0.00                  | Ni foil                 | 8333.00          | 0.00                  |                                                                          |
| $\text{Fe}_2\text{O}_3$ | 7122.32          | 3.00                  | $\text{Ni}_2\text{O}_3$ | 8344.61          | 3.00                  |                                                                          |
|                         |                  |                       | $x = 0$                 | 8340.68          | 1.98                  | $\delta = 0.02$<br>( $\text{NiS}_{1.98}$ )                               |
| $x = 0.1$               | 7118.92          | 2.01                  | $x = 0.1$               | 8340.35          | 1.90                  | $\delta = 0.09$<br>( $\text{Ni}_{0.9}\text{Fe}_{0.1}\text{S}_{1.91}$ )   |
| $x = 0.2$               | 7118.98          | 2.03                  | $x = 0.2$               | 8340.12          | 1.84                  | $\delta = 0.13$<br>( $\text{Ni}_{0.8}\text{Fe}_{0.2}\text{S}_{1.87}$ )   |
| $x = 0.33$              | 7118.89          | 2.00                  | $x = 0.33$              | 8340.27          | 1.88                  | $\delta = 0.08$<br>( $\text{Ni}_{0.67}\text{Fe}_{0.33}\text{S}_{1.92}$ ) |

The nominal sulphur vacancy concentration was calculated on the basis of the nominal valence state of Ni, Fe and S.

**Table S2.** XPS fitting parameters of binding energies for the as-prepared nickel sulfide catalysts.

| Catalyst                                                   | Binding energy (eV)  |                     |                     |                      |                      | Element<br>Ratio (%)<br>Ni : (Fe): S |
|------------------------------------------------------------|----------------------|---------------------|---------------------|----------------------|----------------------|--------------------------------------|
|                                                            | Ni 2p <sub>3/2</sub> | S 2p <sub>3/2</sub> | S 2p <sub>1/2</sub> | Fe 2p <sub>3/2</sub> | Fe 2p <sub>1/2</sub> |                                      |
| Ni Metal                                                   | 852.30               | —                   | —                   | —                    | —                    | —                                    |
| Ni <sub>3</sub> S <sub>2</sub>                             | 852.82               | 162.18              | 163.36              | —                    | —                    | 23.85:27.57                          |
| NiS <sub>2</sub>                                           | 853.56               | 162.58              | 163.79              | —                    | —                    | 4.01:10.26                           |
| Ni <sub>0.9</sub> Fe <sub>0.1</sub> S <sub>2</sub>         | 853.13               | 162.7               | 163.8               | 710.87               | 726.92               | 8.69: (1.03):<br>20.24               |
| Ni <sub>0.8</sub> Fe <sub>0.2</sub> S <sub>2</sub>         | 853.16               | 162.63              | 163.92              | 710.65               | 722.85               | 10.52: (1.47) :<br>21.05             |
| NiS <sub>2</sub> , 50 h                                    | 852.89               | 162.26              | 163.43              | —                    | —                    | 26.03:16.33                          |
| NiS <sub>2</sub> , 100 h                                   | 852.68               | 162.25              | 163.80              | —                    | —                    | 22.92:13.28                          |
| Ni <sub>0.8</sub> Fe <sub>0.2</sub> S <sub>2</sub> , 50 h  | 852.59/<br>855.56    | 162.25              | 163.48              | 711.05               | 722.08               | 20.09: (1.16):<br>10.27              |
| Ni <sub>0.8</sub> Fe <sub>0.2</sub> S <sub>2</sub> , 100 h | 852.77/<br>855.50    | 162.10              | 163.47              | 711.12               | 722.28               | 21.02: (0.95) :<br>16.20             |
| $\alpha$ -NiS                                              | 852.71/<br>855.38    | 161.59              | 162.79              | —                    | —                    | 16.42:10.84                          |
| $\beta$ -NiS                                               | 852.89/<br>856.52    | 161.41              | 162.60              | —                    | —                    | 10.36:14.93                          |
| Ni <sub>3</sub> S <sub>4</sub>                             | 853.17/<br>855.32    | 162.68              | 163.90              | —                    | —                    | 13.32:35.22                          |

**Table S3.** EXAFS fitting parameters at the Ni K-edge and Fe K-edge of various samples ( $S_0^2 = 0.82$ )

| Sample                         | Path  | CN <sup>a</sup> | $R$ (Å) <sup>b</sup> | $\sigma^2 \times 10^{-3}$ (Å <sup>2</sup> ) <sup>c</sup> | $\Delta E$ (eV) <sup>d</sup> | $R$ factor |
|--------------------------------|-------|-----------------|----------------------|----------------------------------------------------------|------------------------------|------------|
| Ni foil                        | Ni-Ni | 12*             | $2.48 \pm 0.01$      | $6.1 \pm 0.2$                                            | $6.7 \pm 0.3$                | 0.001      |
| $x = 0$                        | Ni-S  | $6.0 \pm 0.7$   | $2.40 \pm 0.01$      | $7.4 \pm 1.8$                                            | $2.0 \pm 1.9$                | 0.015      |
| $x = 0.1$                      | Ni-S  | $5.9 \pm 0.6$   | $2.39 \pm 0.01$      | $8.2 \pm 1.5$                                            | $3.5 \pm 1.5$                | 0.010      |
| $x = 0.2$                      | Ni-S  | $5.8 \pm 0.6$   | $2.38 \pm 0.01$      | $8.2 \pm 2.1$                                            | $1.4 \pm 1.8$                | 0.007      |
| $x = 0.33$                     | Ni-S  | $5.4 \pm 0.6$   | $2.36 \pm 0.02$      | $10.9 \pm 3.2$                                           | $1.6 \pm 2.7$                | 0.016      |
| Ni <sub>3</sub> S <sub>2</sub> | Ni-S  | $3.9 \pm 0.4$   | $2.27 \pm 0.02$      | $6.8 \pm 2.4$                                            | $3.8 \pm 1.6$                | 0.001      |
|                                | Ni-Ni | $2.0 \pm 1.1$   | $2.52 \pm 0.03$      | $6.2 \pm 4.0$                                            | $4.6 \pm 4.6$                |            |
| $x = 0.2$<br>0.40 V            | Ni-S  | $5.9 \pm 0.6$   | $2.38 \pm 0.01$      | $7.3 \pm 0.9$                                            | $1.3 \pm 1.1$                | 0.008      |
| $x = 0.2$<br>0.20 V            | Ni-S  | $4.1 \pm 0.4$   | $2.36 \pm 0.01$      | $2.5 \pm 1.6$                                            | $0.9 \pm 2.2$                | 0.011      |
| $x = 0.2$<br>-0.15 V           | Ni-S  | $3.5 \pm 0.4$   | $2.26 \pm 0.02$      | $6.2 \pm 2.5$                                            | $2.4 \pm 2.2$                | 0.001      |
|                                | Ni-Ni | $2.8 \pm 1.6$   | $2.51 \pm 0.03$      | $7.7 \pm 4.5$                                            | $0.1 \pm 5.9$                |            |
| $x = 0$<br>0.40 V              | Ni-S  | $6.0 \pm 0.7$   | $2.39 \pm 0.01$      | $4.6 \pm 1.3$                                            | $1.5 \pm 1.8$                | 0.018      |
| $x = 0$<br>0.20 V              | Ni-S  | $6.0 \pm 0.6$   | $2.38 \pm 0.01$      | $6.1 \pm 1.4$                                            | $1.4 \pm 1.1$                | 0.016      |
| $x = 0$<br>-0.15 V             | Ni-S  | $4.9 \pm 0.5$   | $2.30 \pm 0.01$      | $8.7 \pm 1.7$                                            | $-3.7 \pm 1.9$               | 0.013      |
| $x = 0.2$<br>0.40 V            | Fe-S  | $4.6 \pm 1.1$   | $2.30 \pm 0.02$      | $2.6 \pm 2.2$                                            | $5.9 \pm 2.7$                | 0.015      |
| $x = 0.2$<br>-0.15 V           | Fe-S  | $3.3 \pm 1.9$   | $2.20 \pm 0.03$      | $12.3 \pm 5.8$                                           | $-6.4 \pm 4.8$               | 0.019      |

<sup>a</sup>CN: coordination number; <sup>b</sup> $R$ : bond distance; <sup>c</sup> $\sigma^2$ : Debye-Waller factors; <sup>d</sup> $\Delta E$ : the inner potential correction.  $R$  factor: goodness of fit. \* The experimental EXAFS fit of metal foil by fixing CN as the known crystallographic value.

**Table S4.** Raman spectra of different nickel sulfides.

|                                | Raman Peaks (cm <sup>-1</sup> ) |       |       |       |       |       |       |       |       |
|--------------------------------|---------------------------------|-------|-------|-------|-------|-------|-------|-------|-------|
| NiS <sub>2</sub>               | 274.4                           | 284.8 | 479.3 |       |       |       |       |       |       |
| Ni <sub>3</sub> S <sub>2</sub> | 187.6                           | 202.1 | 223.6 | 303.6 | 324.6 | 350.3 |       |       |       |
| Ni <sub>3</sub> S <sub>4</sub> | 223.3                           | 286.6 | 337.6 | 380.3 |       |       |       |       |       |
| α-NiS                          | 147.4                           | 165.6 | 174.7 | 222.3 | 285.1 | 333.4 | 374.9 |       |       |
| β-NiS                          | 143.1                           | 178.9 | 206.1 | 221.9 | 244.6 | 283.7 | 297.8 | 349.2 | 370.6 |

**Table S5.** In-situ Raman spectra of  $\text{Ni}_{1-x}\text{Fe}_x\text{S}_2$ .

|                             | Raman Peaks ( $\text{cm}^{-1}$ ) |       |       |       |       |       |       |
|-----------------------------|----------------------------------|-------|-------|-------|-------|-------|-------|
| $x = 0, 0.4 \text{ V}$      | 273.4                            | 287.7 | 480.5 |       |       |       |       |
| $x = 0, 0.3 \text{ V}$      | 273.3                            | 287.3 | 480.5 |       |       |       |       |
| $x = 0, 0.2 \text{ V}$      | 273.1                            | 286.1 | 478.2 |       |       |       |       |
| $x = 0, 0.1 \text{ V}$      | 271.8                            | 284.5 | 476.5 |       |       |       |       |
| $x = 0, 0.05 \text{ V}$     | 184.6                            | 197.3 | 218.9 | 301.3 | 320.6 | 346.3 | 476.3 |
| $x = 0, -0.15 \text{ V}$    | 182.5                            | 197.3 | 218.2 | 300.6 | 320.6 | 346.2 |       |
| $x = 0, -0.25 \text{ V}$    | 181.6                            | 195.7 | 216.9 | 300.6 | 320.7 | 346.9 |       |
| $x = 0.1, 0.4 \text{ V}$    | 274.2                            | 284.9 | 479.8 |       |       |       |       |
| $x = 0.1, 0.3 \text{ V}$    | 273.5                            | 283.1 | 478.7 |       |       |       |       |
| $x = 0.1, 0.2 \text{ V}$    | 270.3                            | 281.8 | 476.3 |       |       |       |       |
| $x = 0.1, 0.15 \text{ V}$   | 183.5                            | 197.4 | 220.9 | 302.7 | 322.9 | 348.4 | 476.1 |
| $x = 0.1, 0.1 \text{ V}$    | 184.1                            | 197.4 | 219.6 | 301.4 | 321.1 | 347.1 | 476.1 |
| $x = 0.1, -0.15 \text{ V}$  | 183.5                            | 196.9 | 219.1 | 300.8 | 320.0 | 346.4 |       |
| $x = 0.1, -0.25 \text{ V}$  | 183.5                            | 196.7 | 218.9 | 300.8 | 319.9 | 346.4 |       |
| $x = 0.2, 0.4 \text{ V}$    | 273.5                            | 285.7 | 479.7 |       |       |       |       |
| $x = 0.2, 0.3 \text{ V}$    | 270.6                            | 281.6 | 477.6 |       |       |       |       |
| $x = 0.2, 0.25 \text{ V}$   | 269.6                            | 280.6 | 475.7 |       |       |       |       |
| $x = 0.2, 0.2 \text{ V}$    | 182.5                            | 195.6 | 217.6 | 299.5 | 319.7 | 347.6 | 475.3 |
| $x = 0.2, 0.0 \text{ V}$    | 184.6                            | 196.6 | 217.6 | 300.6 | 320.6 | 346.6 |       |
| $x = 0.2, -0.15 \text{ V}$  | 183.6                            | 196.6 | 218.6 | 300.6 | 319.5 | 345.6 |       |
| $x = 0.2, -0.25 \text{ V}$  | 183.2                            | 196.2 | 218.7 | 299.9 | 321.3 | 346.2 |       |
| $x = 0.25, 0.4 \text{ V}$   | 271.7                            | 283.4 | 479.5 |       |       |       |       |
| $x = 0.25, 0.3 \text{ V}$   | 273.4                            | 284.2 | 478.3 |       |       |       |       |
| $x = 0.25, 0.25 \text{ V}$  | 270.7                            | 282.5 | 475.8 |       |       |       |       |
| $x = 0.25, 0.2 \text{ V}$   | 185.8                            | 197.5 | 218.4 | 300.6 | 320.4 | 347.5 | 475.6 |
| $x = 0.25, 0.0 \text{ V}$   | 183.0                            | 196.6 | 218.4 | 301.5 | 320.5 | 347.4 | 477.6 |
| $x = 0.25, -0.15 \text{ V}$ | 180.9                            | 195.7 | 217.5 | 300.9 | 318.4 | 345.7 |       |
| $x = 0.25, -0.25 \text{ V}$ | 181.0                            | 195.6 | 216.0 | 298.7 | 319.0 | 345.7 |       |
| $x = 0.33, 0.4 \text{ V}$   | 273.7                            | 283.8 | 478.9 |       |       |       |       |
| $x = 0.33, 0.3 \text{ V}$   | 271.8                            | 283.8 | 477.8 |       |       |       |       |
| $x = 0.33, 0.25 \text{ V}$  | 270.7                            | 280.7 | 476.8 |       |       |       |       |
| $x = 0.33, 0.2 \text{ V}$   | 181.8                            | 197.8 | 219.8 | 300.6 | 321.4 | 345.7 | 476.4 |
| $x = 0.33, 0.0 \text{ V}$   | 186.5                            | 198.9 | 220.2 | 300.6 | 322.5 | 349.7 |       |
| $x = 0.33, -0.15 \text{ V}$ | 185.3                            | 198.5 | 220.6 | 300.1 | 323.3 | 347.9 |       |
| $x = 0.33, -0.25 \text{ V}$ | 184.9                            | 198.5 | 219.4 | 302.5 | 322.2 | 347.8 |       |

**Table S6.** Comparisons of HER activity for  $\text{Ni}_{1-x}\text{Fe}_x\text{S}_2$  ( $x = 0.0, 0.1, 0.2, 0.25$  and  $0.33$ ).

|            | Overpotential (mV)<br>@ 10 mA cm <sup>-2</sup> | TOF (H <sub>2</sub> s <sup>-1</sup> ) @<br>200 mV | Mass activity (A g <sup>-1</sup> )<br>@ 200 mV | $R_{\text{ct}}$ ( $\Omega$ )<br>@ 150 mV |
|------------|------------------------------------------------|---------------------------------------------------|------------------------------------------------|------------------------------------------|
| $x = 0$    | 241                                            | 0.007                                             | 11.21                                          | 45.6                                     |
| $x = 0.1$  | 198                                            | 0.037                                             | 52.45                                          | 31.4                                     |
| $x = 0.2$  | 121                                            | 0.136                                             | 171.09                                         | 9.8                                      |
| $x = 0.25$ | 146                                            | 0.071                                             | 84.56                                          | 12.7                                     |
| $x = 0.33$ | 163                                            | 0.030                                             | 31.79                                          | 18.5                                     |

**Table S7.** The DFT +  $U$  calculated energy of Ni 3*d* band center and S 3*p* band center of Ni<sub>1-x</sub>Fe<sub>x</sub>S<sub>2</sub> ( $x = 0.0$ , 0.1, 0.2 and 0.33) and FeS<sub>2</sub> relative to Fermi level.

|                  | Ni 3 <i>d</i> (eV) | Fe 3 <i>d</i> (eV) | S 3 <i>p</i> (eV) | Ni 3 <i>d</i> - S 3 <i>p</i>   (eV) | Fe 3 <i>d</i> - S 3 <i>p</i>   (eV) |
|------------------|--------------------|--------------------|-------------------|-------------------------------------|-------------------------------------|
| $x = 0.0$        | -4.655             |                    | -2.638            | 2.017                               |                                     |
| $x = 0.1$        | -4.542             | -2.504             | -2.573            | 1.969                               | 0.069                               |
| $x = 0.2$        | -4.298             | -1.885             | -2.357            | 1.941                               | 0.472                               |
| $x = 0.33$       | -4.027             | -1.447             | -2.455            | 1.572                               | 1.008                               |
| FeS <sub>2</sub> |                    | -1.315             | -2.777            |                                     | 1.462                               |



**Table S8.** The sulphur vacancy formation enthalpy  $\Delta H_f$ ,  $V_s$  of  $\text{Ni}_{1-x}\text{Fe}_x\text{S}_2$  ( $x = 0.0, 0.1, 0.2$  and  $0.33$ ) and  $\text{FeS}_2$  from DFT +  $U$  calculation.

|                                                    | Energy (eV) | $\mu_i$ (eV) | $\Delta H_f, V_s$ (eV) |
|----------------------------------------------------|-------------|--------------|------------------------|
| $\text{NiS}_2$                                     | -233.93     |              |                        |
| $\text{NiS}_2 - V_s$                               | -228.62     | -4.12        | 1.19                   |
| $\text{Ni}_{0.9}\text{Fe}_{0.1}\text{S}_2$         | -238.94     |              |                        |
| $\text{Ni}_{0.8}\text{Fe}_{0.2}\text{S}_2 - V_s$   | -234.03     | -4.12        | 0.79                   |
| $\text{Ni}_{0.8}\text{Fe}_{0.2}\text{S}_2$         | -243.73     |              |                        |
| $\text{Ni}_{0.8}\text{Fe}_{0.2}\text{S}_2 - V_s$   | -238.93     | -4.12        | 0.68                   |
| $\text{Ni}_{0.67}\text{Fe}_{0.33}\text{S}_2$       | -249.46     |              |                        |
| $\text{Ni}_{0.67}\text{Fe}_{0.33}\text{S}_2 - V_s$ | -244.28     | -4.12        | 1.06                   |
| $\text{FeS}_2$                                     | -321.14     |              |                        |
| $\text{FeS}_2 - V_s$                               | -314.28     | -4.12        | 2.74                   |

**Table S9.** The values of  $\Delta G_{H^*}$  of  $H^*$  at stable adsorption sites  $Ni_3S_2$  slab and Fe doped  $Ni_3S_2$  slab.

|                     | Slab (eV) | Slab-H (eV) | Correction (eV) | $\Delta G_{H^*}$ (eV) |
|---------------------|-----------|-------------|-----------------|-----------------------|
| $Ni_3S_2$           | -195.793  | -198.430    | 0.218           | 0.981                 |
| 8.3% Fe- $Ni_3S_2$  | -198.986  | -202.264    | 0.215           | 0.336                 |
| 16.7% Fe- $Ni_3S_2$ | -202.848  | -206.383    | 0.226           | 0.091                 |
| 25.0% Fe- $Ni_3S_2$ | -206.341  | -210.045    | 0.214           | -0.090                |
| 33.3% Fe- $Ni_3S_2$ | -210.059  | -213.544    | 0.216           | 0.131                 |

**Table S10.** The formation energy of  $\text{Ni}_{1-x}\text{Fe}_x\text{S}_2$  ( $x = 0.0$  and  $0.2$ ) for reconstruction.

| Structure             | $\text{NiS}_2$          | $\text{Ni}_3\text{S}_2$      | $\text{V}_\text{S}\text{-20\%Fe@NiS}_2$  | S               | $20\%\text{Fe@Ni}_3\text{S}_2$           |
|-----------------------|-------------------------|------------------------------|------------------------------------------|-----------------|------------------------------------------|
| Formula               | $\text{Ni}_4\text{S}_8$ | $\text{Ni}_9\text{S}_6$      | $\text{Fe}_4\text{Ni}_{16}\text{S}_{39}$ | $\text{S}_{32}$ | $\text{Fe}_9\text{Ni}_{36}\text{S}_{30}$ |
| Energy (eV)           | -58.207                 | -80.422                      | -299.336                                 | -131.949        | -422.593                                 |
| Normalization (eV)    | -14.552                 | -26.807                      | -14.967                                  | -4.123          | -28.173                                  |
| Formation Energy (eV) |                         | 0.059 eV ( $E_{\text{f1}}$ ) | 0.040 eV ( $E_{\text{f2}}$ )             |                 |                                          |

$$\text{NiS}_2 = 1/3 \text{Ni}_3\text{S}_2 + 4/3 \text{S} \quad (1)$$

$$E_{\text{f1}}' = 1/3 E(\text{Ni}_3\text{S}_2) + 4/3 E(\text{S}) - E(\text{NiS}_2) = 0.118 \text{ eV}$$

$$E_{\text{f1}} = 0.059 \text{ eV}$$

$$\text{V}_\text{S}\text{-Fe}_{0.2}\text{Ni}_{0.8}\text{S}_2 = 1/3 (\text{Fe}_{0.2}\text{Ni}_{0.8})_3\text{S}_2 + 4/3 \text{S} \quad (2)$$

$$E_{\text{f2}}' = 1/3 E(20\%\text{Fe@Ni}_3\text{S}_2) + 4/3 E(\text{S}) - E(\text{V}_\text{S}\text{-20\%Fe@NiS}_2) = 0.080 \text{ eV}$$

$$E_{\text{f2}} = 0.040 \text{ eV}$$

The formation energy is a value normalized to  $\text{NiS}_2$  or  $\text{Fe}_{0.2}\text{Ni}_{0.8}\text{S}_2$ . For convenience of expression, the result normalized to a single sulphur atom as  $E_{\text{fn}} = E_{\text{fn}}' / 2$ .

Operando XAFS experiment at Fe K-edge illustrated that  $\text{Fe}_{0.2}\text{Ni}_{0.8}\text{S}_2$  displayed a reconstruction process with the distorted Fe tetrahedral structure. Moreover, in-situ Raman and operando Ni K-edge XAFS characterizations (Fig. 3a and Fig. 4a in manuscript) demonstrated that  $\text{Ni}_{0.8}\text{Fe}_{0.2}\text{S}_2$  catalysts presented a phase transformation into the heazlewoodite-type  $\text{Ni}_3\text{S}_2$  structure with Ni-S<sub>4</sub> coordination. Considering these reconstructed results for  $\text{Ni}_{0.8}\text{Fe}_{0.2}\text{S}_2$  catalysts comprehensively, the state of Fe after the reconstruction in  $\text{Ni}_{0.8}\text{Fe}_{0.2}\text{S}_2$  catalysts were Fe doped  $\text{Ni}_3\text{S}_2$ . Moreover, sulfur vacancies were demonstrated in the  $\text{Ni}_{0.8}\text{Fe}_{0.2}\text{S}_2$  catalysts by XAFS results (Table S1). On the basis, the reconstruction process was discussed in two cases. The first case was the generating of  $\text{Ni}_3\text{S}_2$  from the phase transition of  $\text{NiS}_2$ . The second case was the generating of 20% Fe doped  $\text{Ni}_3\text{S}_2$  from the phase transition of  $\text{V}_\text{S}\text{-20\%Fe@NiS}_2$  (considering sulphur vacancies in 20%Fe doped- $\text{NiS}_2$ ), and the detailed calculation process was illustrated in Equation 1 and Equation 2.

The formation energy of the reconstruction process was calculated and the results demonstrated a smaller barrier ( $E_{\text{f2}} < E_{\text{f1}}$ ) for the phase transformation of Fe substituted nickel sulfides from the pre-structure to the finalized structure, which theoretically supported the experimental results that Fe substitution prompted the reconstruction process.

**Table S11.** In-situ Raman spectra of  $\alpha$ -NiS,  $\beta$ -NiS and  $\text{Ni}_3\text{S}_4$ .

|                                   | Raman Peaks ( $\text{cm}^{-1}$ ) |       |       |       |       |       |       |
|-----------------------------------|----------------------------------|-------|-------|-------|-------|-------|-------|
| $\beta$ - NiS, 0.4 V              | 147.9                            | 169.4 | 228.2 | 244.9 | 298.7 | 349.1 | 369.1 |
| $\beta$ - NiS, 0.2 V              | 144.5                            | 168.9 | 225.0 | 243.7 | 297.6 | 346.8 | 368.1 |
| $\beta$ - NiS, 0.15 V             | 139.7                            | 171.4 | 221.5 | 242.6 | 295.3 | 346.8 | 366.4 |
| $\beta$ - NiS, 0.1 V              | 181.8                            | 195.8 | 218.0 | 300.0 | 321.1 | 345.6 |       |
| $\beta$ - NiS, -0.15 V            | 185.2                            | 196.9 | 218.0 | 301.1 | 322.2 | 347.8 |       |
| $\beta$ - NiS, -0.25 V            | 182.9                            | 195.8 | 217.9 | 298.7 | 321.1 | 345.5 |       |
| $\alpha$ - NiS, 0.4 V             | 164.3                            | 175.7 | 221.5 | 285.7 | 348.5 |       |       |
| $\alpha$ - NiS, 0.2 V             | 175.5                            | 220.9 | 284.4 | 347.9 |       |       |       |
| $\alpha$ - NiS, 0.1 V             | 165.8                            | 220.2 | 283.0 | 347.2 |       |       |       |
| $\alpha$ - NiS, 0.05 V            | 182.5                            | 196.5 | 218.7 | 301.2 | 322.0 | 348.5 |       |
| $\alpha$ - NiS, -0.15 V           | 181.2                            | 197.8 | 220.2 | 301.1 | 320.7 | 347.2 |       |
| $\alpha$ - NiS, -0.25 V           | 183.8                            | 198.0 | 220.2 | 302.5 | 320.7 | 347.2 |       |
| $\text{Ni}_3\text{S}_4$ , 0.4 V   | 223.1                            | 286.1 | 339.7 | 381.6 | 477.2 |       |       |
| $\text{Ni}_3\text{S}_4$ , 0.2 V   | 220.1                            | 283.9 | 334.3 | 376.8 | 476.4 |       |       |
| $\text{Ni}_3\text{S}_4$ , 0.1 V   | 220.1                            | 283.7 | 336.7 | 379.1 | 477.3 |       |       |
| $\text{Ni}_3\text{S}_4$ , 0.05 V  | 186.7                            | 199.6 | 221.4 | 303.6 | 323.3 | 349.2 |       |
| $\text{Ni}_3\text{S}_4$ , -0.15 V | 181.4                            | 195.5 | 216.1 | 299.2 | 320.4 | 345.1 |       |
| $\text{Ni}_3\text{S}_4$ , -0.25 V | 181.9                            | 195.5 | 217.3 | 299.2 | 319.8 | 345.1 |       |

**Supplementary Note 1.** The discussion on the DFT results of H adsorption and water activation process on the real active structure.

The (101) slab of Fe-doped  $\text{Ni}_3\text{S}_2$  was built to evaluate the HER activity according to the in-situ Raman and TEM results (Figure S22a). With the increment of Fe doping amount, the surface become chaotic, and S atoms gradually run to the outermost layer. In Figure S22b, the electron-density isosurface distribution shows that S is easy to accept electrophilic reagents (H atoms) to adsorb, and this can be confirmed by the in-situ Raman in Figure S18. DFT results in Figure S22c display that Fe substitution can decrease the  $\Delta G_{\text{H}^*}$  from 0.981 eV to -0.091 eV when the doping amount of Fe reached 25 %, and the further incremental Fe substitution amount (33.3%) enhanced the  $\Delta G_{\text{H}^*}$  to 0.131 eV. The calculated results are consistent with our experimental results that 20% (16.7% ~25%) Fe doped nickel sulfides exhibit the best HER activity.

In addition, the water adsorption and dissociation behavior on the electrocatalyst surface as the same initial step for HER is a crucial factor for water splitting in basic electrolyte. The H-O-H bond must first be destroyed by the dissociation of water prior to the adsorption of  $\text{H}^*$ , (i.e.,  $\text{H}_2\text{O} + \text{e}^- \rightarrow \text{H}^* + \text{OH}^-$  [the Volmer reaction]). The calculated results illustrate that water adsorption is more thermodynamically favorable on Fe doped  $\text{Ni}_3\text{S}_2$  (Figure S22d, f). Specifically, the water adsorption free energies ( $E_{\text{ads}}$ , -0.510 eV) of Fe doped  $\text{Ni}_3\text{S}_2$  on Fe site own the lowest, suggesting that water adsorption on Fe site of Fe doped  $\text{Ni}_3\text{S}_2$  is easier than those on Ni site of Fe doped  $\text{Ni}_3\text{S}_2$  and  $\text{Ni}_3\text{S}_2$  ( $E_{\text{ads}}$  is -0.234 and -0.019 eV, respectively). It should be noted that there is also a much lower energy barrier for water dissociation in the catalytic Fe doped  $\text{Ni}_3\text{S}_2$  from the DFT results (Figure S22e, g), which collaboratively favor the Volmer step to generate  $\text{H}_{\text{ads}}$ . Unfortunately,  $\text{Ni}_3\text{S}_2$  exhibits unfavorable catalyst- $\text{OH}_{\text{ad}}$  energetics on the Ni site, exhibiting a very high activated water adsorption energy  $\Delta G(\text{H}_2\text{O})$  up to 1.309 eV. This high  $\Delta G(\text{H}_2\text{O})$  significantly hinders the dissociation of water to  $\text{H}^*$  intermediates and leads to sluggish HER kinetics. Notably, Fe doped  $\text{Ni}_3\text{S}_2$  electrocatalysts can provide the active sites for hydroxyl adsorption, and the followed  $\Delta G(\text{H}_2\text{O})$  is reduced to 0.159 eV on the Fe site of Fe doped  $\text{Ni}_3\text{S}_2$ , indicating the Fe doped  $\text{Ni}_3\text{S}_2$  electrocatalysts are effective for cleaving HO-H bonds.

Based on these, Fe substitution in nickel sulfides can efficiently promote water adsorption and activation process to facilitate the Volmer step to optimize H adsorption. Fe substitution can also vary the electronic structure of catalyst to modulate S- $\text{H}_{\text{ads}}$  bonds formed on catalyst surfaces and will optimize H desorption to promote Heyrovsky step to realize efficient performance in alkaline media.

**Supplementary Note 2.** The discussion on the dynamic reconstruction process of Fe doped  $\alpha$ -NiS,  $\beta$ -NiS and  $\text{Ni}_3\text{S}_4$ .

XRD patterns and XAFS results in Figure S24 demonstrate that the as-prepared  $\beta\text{-Ni}_{1-x}\text{Fe}_x\text{S}$  catalysts maintain the rhombohedral crystal structure (JCPDS 12-0041), and Fe substitution suggests a great flexibility in  $\beta\text{-Ni}_{1-x}\text{Fe}_x\text{S}$  catalysts with a lower Ni valence state, more sulphur vacancies and the increased lattice disorder. In Figure S25, in-situ Raman results present that Fe doping can facilitate the reconstruction process of  $\beta$ -NiS catalysts with the reconstruction potential thresholds locating in regions of 0.15~0.1 V, 0.15~0.1 V, and 0.2~0.15 V (vs. RHE) for  $x = 0, 0.05$  and  $0.1$ , respectively. Notably,  $\beta\text{-Ni}_{0.9}\text{Fe}_{0.1}\text{S}$  electrode displays superior HER activity with an overpotential of 189 mV at  $10 \text{ mA cm}^{-2}$ , Tafel slope of  $55 \text{ mV dec}^{-1}$  and the smallest  $R_{\text{ct}}$  value of  $14 \Omega$ . In Figure S25f, the exhibited synchronous trend between reconstruction potential threshold range and overpotential implicate the close correlation concerning reconstruction initiate and HER activation. Partial Fe substitution in  $\beta$ -NiS catalysts grants controllable sulphur vacancies to make it easier to evolve into active phase, thereby lowering the applied potential threshold for phase variation. Such phase reconfiguration enables easier activity triggering and hence optimizes HER performance. Operando XAFS in Figure S26 further demonstrate that Fe doping in  $\beta$ -NiS can promote the reconstruction process from a facilitated variation in the valence state of the Ni moieties as reflected by the XANES results and the reconfiguration in their local atomic structure. Specifically, the Ni-S peaks in the FT curves show an obvious low- $R$  shift from  $1.87 \text{ \AA}$  to  $1.75 \text{ \AA}$ , and the FT peak's intensity exhibits a decrease for the  $x = 0.1$  sample at  $-0.2 \text{ V}$  (vs. RHE) (Figure S26d). In addition, the as-prepared  $\text{Ni}_{3-3x}\text{Fe}_{3x}\text{S}_4$  and  $\alpha\text{-Ni}_{1-x}\text{Fe}_x\text{S}$  catalysts present the similar synchronous trend between reconstruction potential threshold range and overpotential with the increase of Fe doping amount, these results reconfirm the Fe substitution effect on the reconfiguration process for nickel sulfide catalysts (Figure S27 and Figure S28).

These results establish the promotion effect on phase reconfiguration process and the subsequent HER performance originated from Fe substitution, and the evolution law on transition metal's valence state, along with the dynamic structure-activity correlation have been also identified. Therefore, a universal rule of Fe substitution in multivalent transition metals-based catalysts have been demonstrated, to improve the structural flexibility, facilitating the evolution process with enhance HER performance.
